1 **Environmental DNA reveals the structure of phytoplankton**  
2 **assemblages along a 2900-km transect in the Mississippi River**

3

4 Authors

5 Joseph M. Craine<sup>1,\*</sup>, Michael W. Henson<sup>2</sup>, J. Cameron Thrash<sup>2</sup>, Jordan Hanssen<sup>3</sup>, Greg Spooner<sup>3</sup>,  
6 Patrick Fleming<sup>3</sup>, Markus Pukonen<sup>3</sup>, Frederick Stahr<sup>4</sup>, Sarah Spaulding<sup>5</sup>, Noah Fierer<sup>1,6,7</sup>

7

8 Affiliations

9 1. Jonah Ventures, 1600 Range St. #201, Boulder, CO, 80301 USA.

10 2. Department of Biological Sciences, Louisiana State University, Baton Rouge, LA, USA.

11 3. O.A.R. Northwest, Seattle, WA 98103, U.S.A.

12 4. School of Oceanography, University of Washington, Seattle, WA 98195, USA.

13 5. Institute of Arctic and Alpine Research, University of Colorado, Boulder, 80309 USA

14 6. Department of Ecology and Evolutionary Biology, University of Colorado, Boulder, CO

15 80309, USA

16 7. Cooperative Institute for Research in Environmental Science, University of

17 Colorado, Boulder, CO 80309

18

19

20 \*Contact

21 josephmcraine@gmail.com

## 22 Abstract

23 The environmental health of aquatic ecosystems is critical to society, yet traditional assessments  
24 of water quality have limited utility for some bodies of water such as large rivers. Sequencing of  
25 environmental DNA (eDNA) has the potential to complement if not replace traditional sampling  
26 of biotic assemblages for the purposes of reconstructing aquatic assemblages and, by proxy,  
27 assessing water quality. Despite this potential, there has been little testing of the ability of eDNA  
28 to reconstruct assemblages and their absolute and relative utility to infer water quality metrics.  
29 Here, we reconstruct phytoplankton communities by amplifying and sequencing DNA from a  
30 portion of the 23S rRNA region from filtered water samples along a 2900-km transect in the  
31 Mississippi River. Across the entire length, diatoms dominated the assemblage (72.6%) followed  
32 by cryptophytes (8.7%) and cyanobacteria (7.0%). There were no general trends in the  
33 abundances of these major taxa along the length of the river, but individual taxon abundance  
34 peaked in different regions. For example, the abundance of taxa genetically similar to *Melosira*  
35 *tropica* peaked at approximately 60% of all reads 2750 km upstream from the Gulf of Mexico,  
36 while taxa similar to *Skeletonema marinoi* began to increase below the confluence with the  
37 Missouri River until it reached approximately 30% of the reads at the Gulf of Mexico. There  
38 were four main clusters of samples based on phytoplankton abundance, two above the  
39 confluence with the Missouri and two below. Phytoplankton abundance was a poor predictor of  
40  $\text{NH}_4^+$  concentrations in the water, but predicted 61% and 80% of the variation in observed  $\text{NO}_3^-$   
41 and  $\text{PO}_4^{3-}$  concentrations, respectively. Phytoplankton richness increased with increasing  
42 distance along the river, but was best explained by phosphate concentrations and water clarity.  
43 Along the Mississippi transect, there was similar structure to phytoplankton and bacterial  
44 assemblages, indicating that the two sets of organisms are responding to similar environmental

45 factors. In all, the research here demonstrates the potential utility of metabarcoding for  
46 reconstructing aquatic assemblages, which might aid in conducting water quality assessments.  
47

## 48 Introduction

49 Inland freshwater systems provide vital services of drinking water, habitat for fisheries, irrigation  
50 for agriculture and recreation (Davies and Jackson 2006, American Sportfishing Association  
51 2015). Yet, the ecological status of lakes, rivers, streams, and reservoirs is increasingly  
52 threatened by agriculture, roads, industry, mining, human waste, urbanization, and deforestation  
53 (Malmqvist and Rundle 2002, US Environmental Protection Agency 2015) Effective monitoring  
54 of water quality and the causes of water quality impairment are critical steps to maintaining  
55 freshwater resources, preventing further degradation, and guiding restoration efforts. Quantifying  
56 the state and dynamics of aquatic ecosystems is often best done indirectly by quantifying the  
57 structure of aquatic assemblages (Palaniappan et al. 2010, Young and Loomis 2014). Because  
58 each organism has a unique set of ecological traits and responds uniquely to environmental  
59 conditions, their abundance in waters is an indicator of environmental conditions such as salinity,  
60 temperature, oxygen levels, nutrient supplies, and turbidity (Karr 1999, Schoolmaster et al. 2012).

61  
62 Fish and aquatic invertebrates are the two of the most common indicators quantified for the  
63 purpose of inferring water quality (Barbour et al. 1999, Stein et al. 2014a). Yet, assessments of  
64 these assemblages are currently labor intensive, slow, expensive, and often imprecise. For  
65 example, manually sampling fish or aquatic invertebrate communities can cost approximately  
66 US\$2500 for a single site, limiting the number of sites that can be sampled (Stein et al. 2014a).  
67 Biotic assessments also are less effective for certain types of aquatic ecosystems. For example,  
68 even without fiscal constraints, assessments of fish and aquatic insect assemblages of large rivers  
69 can be exceedingly difficult. The efficiency of sampling fish in large rivers with traditional  
70 electrofishing is low (and seasonally variable) due to a number of factors such as turbidity

71 (Goffaux et al. 2005, Reyjol et al. 2005, Lyon et al. 2014). Standard techniques for kicknetting  
72 insects or collecting exuviae do not work on large rivers (Buss et al. 2015).  
73  
74 One response to the constraints on sampling fish and insects for large rivers is to rely on other  
75 organisms such as diatoms for water quality assessments (Kelly and Whitton 1995, Stein et al.  
76 2014a). Yet, traditional techniques for visually assessing the relative abundance of taxa such as  
77 diatoms is still expensive, subject to taxonomic bias, and constrained by low taxonomic  
78 resolution (Zimmermann et al. 2015). Given these constraints, next generation sequencing of  
79 environmental DNA has the potential to quantify assemblages of not only fish and aquatic  
80 insects, but also smaller organisms such as phytoplankton or bacteria (Mächler et al. 2014, Stein  
81 et al. 2014b, Barnes and Turner 2015, Thomsen and Willerslev 2015). To accomplish this, DNA  
82 present in the water is filtered and then regions in the genome are amplified and sequenced,  
83 providing information on the presence, if not relative abundance, of organisms. Depending on  
84 the regions of the genome amplified, different taxonomic groups can be sequenced, including  
85 bacteria, phytoplankton, arthropods, fish, and mammals (Jackson et al. 2014, Stein et al. 2014b,  
86 Cannon et al. 2016, Deiner et al. 2016, Olds et al. 2016). This potential is coupled with the  
87 ability to provide data for less cost, or improved taxonomic specificity, and at a faster rate. For  
88 example, water can be filtered and analyzed for environmental DNA at less than a tenth of the  
89 cost of traditional biotic assessments.  
90  
91 Despite this potential, there are few examples of successful application of metabarcoding for  
92 reconstructing phytoplankton assemblages and we have not started in earnest to assess whether  
93 these reconstructions have value on their own, no less relative to reconstructions generated with

94 organisms (Hamsher et al. 2013). To better understand the potential of environmental DNA to  
95 reconstruct phytoplankton assemblages in a large river, we amplified and sequenced DNA using  
96 a 23S rRNA gene region primer pair (Sherwood and Presting 2007) specific to phytoplankton  
97 (hereafter, 23S) for 39 sites along over 2900 km of the Mississippi River in addition to its  
98 headwaters at Lake Itasca. The Mississippi River is one of the Great Rivers of the US and has  
99 been the subject of a number of studies attempting to assess the ecological health of its waters  
100 with biological assessment (Angradi et al. 2009, Kireta et al. 2012b, Bellinger et al. 2013). With  
101 these data, we examined the patterns of phytoplankton assemblages along the length of the river  
102 to determine how the structure and richness of these assemblages changed along the length of the  
103 river. As a first test, we compared relationships between the abundance of 23S OTUs and  
104 nutrient concentrations in the water. Next, to assess whether the factors structuring  
105 phytoplankton were similar to those structuring bacterial assemblages, we compared assemblage  
106 structure of 23S and bacterial 16S rRNA gene (hereafter, 16S) OTUs from a previous set of  
107 analyses (Henson et al. in review). This was followed with a comparison of the explanatory  
108 power of 23S and 16S OTUs to predict nutrient concentrations.

## 109 **Methods**

### 110 **Sample acquisition**

111 Duplicate water samples were collected from 39 sites along the Mississippi River from  
112 September 18, 2014 to November 26, 2014 (Henson et al. in review). The core of these sites  
113 spanned 2917 km, from Minneapolis, MN to the Gulf of Mexico. An additional sample was  
114 acquired from Lake Itasca, the headwaters of the river. At each site, 120 mL of water was filtered  
115 through a 2.7  $\mu\text{m}$  GF/D filter (Whatman GE, New Jersey, USA) and then a 0.2  $\mu\text{m}$  Sterivex filter

116 (EMD Millipore, Darmstadt, Germany) with a sterile 60 mL syringe (BD, New Jersey, USA).  
117 The first 60 mL of flow-through water was collected and saved in an autoclaved, acid-washed 60  
118 mL polycarbonate bottle. Filters and filtrate were stored on ice until they could be shipped to the  
119 laboratory for analyses. At each site, light penetration was assessed with a secchi disk (Wildco,  
120 Yulee, FL).

## 121 **Sample processing**

122 DNA was extracted from filters with a MoBio PowerWater DNA kit (MoBio Laboratories,  
123 Carlsbad, CA) following the manufacturer's protocol. If there was sufficient DNA remaining  
124 from previous analyses (Henson et al. in review), DNA from the two fractions for a site were  
125 combined. For some sites, DNA from the two fractions taken from the two replicate samples  
126 were combined. Phytoplankton sequences were amplified at the 23S rRNA gene region, which is  
127 located on the chloroplast and can amplify DNA from taxa such as cyanobacteria, green algae,  
128 and diatoms (Sherwood and Presting, 2007). Initial PCR amplification included Promega  
129 Mastermix, forward and reverse primers, gDNA, and DNase/RNase-free H<sub>2</sub>O. After an initial 3-  
130 minute period at 94°C, DNA was PCR amplified for 40 cycles at 94°C (30 seconds), 55°C (45  
131 seconds) and 72°C (60 seconds), followed by 10 minutes at 72°C. Products were then visualized  
132 on an 2% agarose gel. 20µl of the PCR amplicon was used for PCR clean-up using ExoI/SAP  
133 reaction. In order to index the amplicons with a unique identifier sequence, the first PCR stage  
134 was followed by an indexing 8-cycle PCR reaction to attach 10-bp error-correcting barcodes  
135 unique to each sample to the pooled amplicons. These products were again visualized on a 2%  
136 agarose gel and checked for band intensity and that amplicons are the correct size. PCR products  
137 were purified and normalized using the Life Technologies SequalPrep Normalization kit and



138 samples pooled together. Amplicons were sequenced on an Illumina MiSeq at the University of  
139 Colorado Boulder BioFrontiers Sequencing Center running the v2 500-cycle kit.

140 For nutrient analyses, filtrate was previously analyzed colorimetrically for  $[\text{NH}_4^+]$ ,  $[\text{NO}_3^-]$ , and  
141  $[\text{PO}_4^{3-}]$  at the University of Washington Marine Chemistry Laboratory as described in Henson et  
142 al. (in review).

### 143 **Bioinformatic processing**

144 Sequences were demultiplexed using a python script. Paired end reads were then merged using  
145 fastq\_merge pairs. Since merged reads often extended beyond the amplicon region of the  
146 sequencing construct, we used fastx\_clipper to trim primer and adaptor regions from both ends  
147 ([https://github.com/agordon/fastx\\_toolkit](https://github.com/agordon/fastx_toolkit)). Sequences lacking a primer region on both ends of  
148 the merged reads were discarded. Sequences were quality trimmed to have a maximum expected  
149 number of errors per read of less than 0.1 and only sequences with more than 3 identical  
150 replicates were included in downstream analyses. BLASTN 2.2.30+ was run locally, with a  
151 representative sequence for each OTU as the query and the current NCBI nt nucleotide and  
152 taxonomy database as the reference. The tabular BLAST hit tables for each OTU representative  
153 were then parsed so only hits with > 97% query coverage and identity were kept.

154 Sequences were clustered into OTUs at the  $\geq 97\%$  sequence similarity level and sequence  
155 abundance counts for each OTU were determined using the usearch7 approach. The National  
156 Center for Biotechnology Information (NCBI) genus names associated with each hit were used  
157 to populate the OTU taxonomy assignment lists. Sequences that did not match over 90% of the  
158 query length and did not have at least 85% identity were considered unclassified. Otherwise the  
159 top BLASTn hit was used.

## 160 **Statistical analyses**

161 To quantify the accumulation of 23S OTUs with increasing numbers of samples, we used the  
162 *specaccum* function of the *vegan* package with the Lomolino function to describe the curves  
163 (Oksanen et al. 2017).

164 Hierarchical clustering of 23S was based on Ward's minimum variance method. A heat map was  
165 generated with the *heatmap.2* function of the *gplots* package (Warnes et al. 2016) using distance  
166 matrices created from the relative abundance of the top 50 23S OTUs. To identify taxa  
167 disproportionately associated with the 8 major clusters, indicator values were calculated for each  
168 of the top 50 OTUs based on abundance of occurrence (Dufrêne and Legendre 1997).

169 To assess the relationships between nutrient concentrations and 23S OTU abundance, forward  
170 stepwise regression was performed for  $[\text{NH}_4^+]$ ,  $[\text{NO}_3^-]$ , and  $[\text{PO}_4^{3-}]$  with the top 50 23S OTUs ( $P$   
171  $< 0.01$  for entry). To assess the relationships between phytoplankton richness and predictors, all  
172 singletons were removed from the abundance of reads, phytoplankton richness was first rarefied  
173 to the minimum number of reads for the sample set (4,212) and then regressed in a backwards  
174 elimination stepwise regression with nutrient concentration data, distance along the river, and  
175 secchi disk depth.

176 To compare 23S and 16S patterns, we restricted 16S data to the top 100 OTUs, representing 76%  
177 of the total reads. Previously, the 16S region was sequenced for the two particle size fractions  
178 independently (Henson et al. in review). Here, bacterial OTU abundance was averaged for the  
179 two fractions for a given sample. Mantel tests (*mantel* function of the *vegan* package) assessed  
180 Pearson correlations among assemblage similarity matrices, which were based on Euclidean  
181 distances. A cophenetic correlation was assessed for the 23S and 16S distance matrices using the  
182 *cor\_cophenetic* function of *dendextend* package (Galili 2015). To visualize similarity in  
183 clustering between 23S and 16S OTU abundances, a tanglegram was generated using the  
184 *tanglegram* function of *dendextend* package based on the 23S hierarchical clustering and a new  
185 hierarchical clustering of 16S data also based on Ward's minimum variance method. The same  
186 stepwise regression technique on nutrient concentrations was used for the top 50 16S OTUs as  
187 was done for the 23S OTUs.

188 All statistical analyses were conducted in R 3.2.5 using Rstudio v. 1.0.136 except the stepwise  
189 regressions, which were computed in JMP v. 13.0.0 (SAS Institute, Cary NC, USA).

## 190 **Results**

191 Across all samples, the most abundant phytoplankton OTU was for taxa similar to *Thalassiosira*  
192 *rotula*, which represented 37.6% of all reads. The next most abundant OTU was for taxa similar  
193 to the diatom *Melosira tropica*, which represented 15.8% of all reads. In general, the top 10  
194 OTUs represented 80.9% of all reads and the top 50 OTUs represented 96.4% of all reads.  
195 Among the top 50 OTUs, 72.6% of the reads were from Bacillariophyta, 8.7% were from  
196 Cryptophyta, and 7.0% were from Cyanobacteria. Chlorophyta and Eustigmatophyceae  
197 comprised 3.5% and 3.2% of the reads, respectively. Examining the pattern of OTU

198 accumulation, OTU abundance is predicted to asymptote at 447 OTUs with half of this occurring  
199 in 11.8 samples (Figure 1). Mean richness after rarefaction was  $55.3 \pm 15.9$  (s.d.) OTUs per  
200 sample. Mean richness increased at a rate of  $7.1 \pm 1.7$  species per 1000 km ( $r^2 = 0.23$ ,  $P < 0.001$ ).

201  
202 Phytoplankton had different patterns of distribution along the length of the river (Figure 2).  
203 Among the four most abundant OTUs, *Melosira tropica* OTU abundance peaked at  
204 approximately 60% of all reads 2750 km upstream from the Gulf of Mexico, while *Thalassiosira*  
205 *rotula* OTU abundance peaked at approximately 90% of all reads approximately 2250 km from  
206 the Gulf. In contrast, *Cyclotella* sp. WC03 (OTU 48) did not peak until ~1300 km from the Gulf  
207 (17% of all reads) and the *Skeletonema marinoi* OTU continued to increase below the confluence  
208 with the Missouri River, until it reached approximately 30% of the reads at the Gulf of Mexico.  
209 There were no general trends in the abundance of phytoplankton groups with respect to distance  
210 along the river when read abundance for the top 50 OTUs was aggregated by phylum (Figure 3).

211

## 212 **Clustering of sites**

213 The phytoplankton of Lake Itasca was the most unique set of OTUs and did not cluster with any  
214 other samples (Figure 4). The Lake Itasca assemblage was characterized by the abundance of  
215 chrysophyte species similar to *Ochromonas danica*, dinoflagellates similar to *Dinophysis fortii*  
216 and species similar to the yellow-green alga *Trachydiscus minutus* (Table 1). Beyond Lake Itasca,  
217 four other main clusters of sites were identified, which encompassed 57 of the remaining 61  
218 samples. The first cluster contained 17 of the 27 samples taken upstream of the confluence with  
219 the Missouri River (Figure 4). These samples were indicated by their abundances of taxa similar  
220 in sequence to *Thalassiosira rotula* ( $P = 0.003$ ; Table 1). The second cluster consisted of 8

221 samples in the Upper Mississippi that ranged along 300 km from Lake Pepin in Minnesota to  
222 Dubuque, Iowa. These sites were indicated by their abundances of species similar in sequence to  
223 the dinoflagellate *Gymnodinium eucyaneum*, the diatom *Tenuicylindrus* sp., the cryptomonad  
224 *Cryptochloris*, and the diatom *Melosira tropica* (Table 1). The third main cluster denoted 20 of  
225 the samples below the confluence with the Missouri River, primarily by their abundance of taxa  
226 similar in sequence to *Skeletonema marinoi*. The fourth main cluster contained 12 samples below  
227 the Missouri River confluence from above Vicksburg, MS to just below Three Rivers Wildlife  
228 Management Area. These samples were indicated by their abundances of species similar in  
229 sequence to the cryptomonads *Teleaulax acuta*, *Cryptomonas* sp., and *Plagioselmis*  
230 *nannoplantica* as well as two diatom OTUs for species similar in sequence to *Cyclotella* sp.  
231 (Table 1).

232

### 233 **Relationships with nutrient data**

234 The best predictor of  $\text{NH}_4^+$  concentrations at a given location was the abundance of diatoms  
235 similar in sequence to *Sellaphora pupula*, which explained 38% of variation in  $[\text{NH}_4^+]$  (Table 2),  
236 but mostly as a result of two sites having high  $[\text{NH}_4^+]$  ( $> 25 \mu\text{g L}^{-1}$ ) and abundances of  
237 *Sellaphora pupula*. After this OTU, the abundances of no other phytoplankton OTU predicted  
238  $\text{NH}_4^+$  concentrations ( $P > 0.01$  for all OTUs).  $[\text{NO}_3^-]$  was best predicted by 4 diatom OTUs,  
239 which explained 61% of the variation in  $[\text{NO}_3^-]$ . Nitrate concentrations decreased with increasing  
240 abundances of species similar in sequence to *Melosira tropica* and increased with increasing  
241 abundances of species similar in sequence to *Cyclotella* sp. WC03, *Navicula salinicola*, and  
242 *Dinophysis fortii* (Table 2). 80% of the variation in  $[\text{PO}_4^{3-}]$  was explained by the abundances of  
243 six diatom OTUs (Table 2).  $[\text{PO}_4^{3-}]$  increased with increasing abundances of species similar in

244 sequence to *Skeletonema marinoi*, *Cyanobium* sp. *Navicula salinicola*, *Cyclotella* sp. WC03,  
245 *Cryptomonas ovata*, and *Dinophysis fortii*. Phytoplankton OTU richness increased downstream  
246 ( $P < 0.01$ ), but in the backwards elimination stepwise regression, phytoplankton OTU richness  
247 (intercept =  $16.42 \pm 6.83$ ;  $P = 0.02$ ) increased with increasing secchi disk depth ( $0.295 \pm 0.071$   
248 OTUs  $\text{cm}^{-1}$ ;  $P < 0.001$ ) and with increasing  $[\text{PO}_4^{3-}]$  ( $0.328 \pm 0.048$  OTUs  $(\mu\text{g L}^{-1})^{-1}$ ;  $P < 0.001$ )  
249 (Figure 5).

## 250 **Comparing phytoplankton and bacteria**

251 Comparing distance matrices with a Mantel test, 23S and 16S assemblages were correlated ( $r =$   
252  $0.44$ ,  $P < 0.001$ ). Similarly, the hierarchical clustering of sites based on 23S and 16S  
253 assemblages were correlated (cophenetic correlation,  $r = 0.43$ ), revealing structural similarity in  
254 the two assemblages. For example, comparing the dendrograms, paired samples often clustered  
255 together for both the 23S and 16S assemblages, such as the D samples and Aa samples. Also,  
256 sites U and W were more similar to one another than other sites for both 23S and 16S (Figure 6).  
257 Stepping back to the broader patterns, the major clusters of sites in the 23S data were also largely  
258 present for the 16S data, though the relative positions within this cluster were mixed. Some  
259 differences in the clustering between the two sets of samples were likely due to stochasticity or  
260 contamination in individual samples for one primer pair. For example, with the 23S data, site P  
261 clustered with the Al sites. Yet, in the 16S data it clustered more closely with the adjacent O sites.  
262 Compared to phytoplankton, using the same forward stepwise regression technique—top 50  
263 OTUs,  $P < 0.01$  for entry—bacterial OTUs typically explained a greater proportion of nutrient  
264 concentrations in the water. For  $[\text{NH}_4^+]$ , five bacterial OTUs predicted 69% of the variation in  
265  $[\text{NH}_4^+]$  compared to 38% of the variation with phytoplankton (Table 3). Sites with greater  
266 abundances of three OTUs (a Firmicutes, a Bacteroidetes, and a Proteobacteria) had higher

267  $[\text{NH}_4^+]$  while sites with greater abundances of two OTUs (an Actinobacteria and a Bacteriodes) 268 had lower  $[\text{NH}_4^+]$  (Table 3). For  $[\text{NO}_3^-]$ , phytoplankton had predicted 61% of the variation, but 269 the abundances of six bacterial OTUs explained 80%.  $[\text{NO}_3^-]$  concentrations increased with 270 increasing abundances of two bacterial OTUs (an Actinobacteria and a Bacteriodes) and 271 decreased with increasing abundances of four bacterial OTUs (an Actinobacteria, a Bacteriodes, 272 and two Proteobacteria) (Table 3). For  $[\text{PO}_4^{3-}]$ , bacteria predicted 81% of the variation in 273 concentrations, compared to 80% for phytoplankton.  $[\text{PO}_4^{3-}]$  were lower with increasing 274 abundances of three bacterial OTUs (an Actinobacteria, a Bacteriodes, and a Proteobacteria) 275 and increased with increasing abundances of a Planctomycetes OTU (Table 3).

## 276 Discussion

277 Overall, this research demonstrates the potential of sequencing the 23S region in water samples 278 to reconstruct a broad diversity of the phytoplankton assemblage and provide information on 279 underlying environmental conditions. Here, we saw that 23S-derived phytoplankton assemblages 280 shifted along the length of the river, paralleled shifts in bacterial assemblages, and could predict 281 abiotic conditions such as aquatic inorganic nutrient concentrations. These results support the 282 further development of 23S sequencing of aquatic eDNA to reconstruct phytoplankton 283 assemblages in order to infer environmental conditions.

284 The patterns in phytoplankton eDNA abundance observed for the Mississippi River were similar 285 to those in other rivers. For example, Cannon et al. sequenced both 16S and 23S along the length 286 of the Cuyahoga River in northern Ohio, USA (Cannon et al. 2017). As with the Mississippi, in 287 the Cuyahoga, phytoplankton 23S OTUs were spatially patterned and many phytoplankton and 288 bacteria were correlated along the length of the river, potentially reflecting underlying

289 environmental conditions. In another study, Craine et al. sequenced 4 primer pairs including 16S  
290 and 23S to reconstruct biotic assemblages along 475 km of the Potomac River in Maryland, USA  
291 (Craine et al. in review). As with the Mississippi River, phytoplankton assemblages were  
292 distinctly patterned along the river and were strongly associated with river size and aquatic  
293 phosphorus concentrations. For the Potomac, phytoplankton richness increased downstream, just  
294 as with the Mississippi. Among these three studies, there were strong differences in  
295 phytoplankton assemblages. For example, compared to the Mississippi River, the Cuyahoga  
296 River had a greater dominance of Cryptophytes. Although both the lower Potomac and  
297 Mississippi were dominated by diatoms, different diatoms dominated the two rivers.

298 Traditional sampling of large rivers with visual quantification of phytoplankton also showed  
299 many similar patterns as we observed here. For example, in the River Loire, large portions of the  
300 river were dominated by diatoms and many taxa were associated with eutrophic conditions  
301 (Abonyi et al. 2012). In the Upper Missouri/Mississippi/Ohio River basin in 2004/5,  
302 phytoplankton diatom assemblages responded to agricultural disturbance, urbanization, and  
303 eutrophication (Kireta et al. 2012b). Compared to the other two rivers, the upper Mississippi  
304 River was distinguished by its high levels of eutrophication, with many of the taxa observed here  
305 in high abundance (or congeners) being indicative of eutrophic and/or high agricultural or urban  
306 disturbance (Kireta et al. 2012b). The lower Mississippi River is also considered generally  
307 eutrophic and many of the taxa that indicated eutrophic or saline conditions were similar to those  
308 that dominated assemblages here (Bellinger et al. 2013).

309 Empirically, given the greater abundance of phytoplankton in waters than, for example, insects  
310 or fish, there has been greater success sequencing the eDNA of phytoplankton than larger  
311 organisms. This further favors developing the use of phytoplankton over other taxa. The ability



312 in this study of the relative abundance of phytoplankton to predict aquatic nutrient concentrations  
313 should encourage future research to develop this technique for bioassessment. For example,  
314 sections of the Mississippi River with high abundances of *Melosira tropica* and *Navicula*  
315 *salinicola* or low abundances of a *Cyclotella* OTU had high  $[\text{NO}_3^-]$ . If these relationships were to  
316 hold up across different river systems and seasons, then the abundances of these species as  
317 determined by sequencing eDNA could broadly serve as an indicator of  $[\text{NO}_3^-]$  without having to  
318 measure it directly. Given that using a similar technique, strong relationships between aquatic  
319 nutrient concentrations and phytoplankton abundances were seen in the Potomac River, too  
320 (Craine et al. in review), this method continues to show promise as a bioassessment tool. To our  
321 knowledge, there is no theory to explain why phytoplankton diversity increases with distance  
322 downstream and/or with increased  $[\text{PO}_4^{3-}]$ , which was also observed in the Potomac. In fact, such  
323 observations actually run counter to the popular River Continuum Concept, which postulated that  
324 after an initial increase in headwaters, diversity should decrease with increasing river size  
325 (Vannote et al. 1980). However our observed trend of increasing diversity is consistent with  
326 other measurements of Mississippi River microbial assemblages (Payne et al. 2017)(Henson et al.  
327 in review). Theory aside, it will take much larger datasets to assess whether phytoplankton  
328 diversity, in and of itself, is diagnostic for any environmental conditions.

329 Greater taxonomic resolution is likely possible with other primer pairs in conjunction with 23S,  
330 but there is no evidence yet that this is necessary. That said, there are still areas where more  
331 research is required before metabarcoding with 23S for phytoplankton assemblages can be  
332 operationalized. For example, the number of sequences known from diatom taxa is small fraction  
333 of the several thousand species described from North America (Kocielek 2006). Of the nearly  
334 one thousand taxa listed in the Diatoms of the US web flora (Spaulding et al. 2010),

335 approximately one hundred have associated sequences that are currently available in GenBank.  
336 Other studies (Visco et al. 2015) report that only 28% of taxa identified by microscopy had  
337 corresponding reads in sequence data. Consequently, for diatoms, the OTUs were mapped to taxa  
338 that were most similar, with the outcome that species that are well-characterized in gene  
339 sequences (i.e. *Melosira tropica*) that have not reported from inland waters in river surveys (U.S.  
340 Geological Survey BioData).

341 It is possible that the OTU matches to *Melosira tropica* could reflect the presence of the very  
342 common *M. varians*. *Melosira tropica* has not been reported from inland waters, but *M. varians*  
343 is one of the very common river species (Potapova and Charles 2007). Although it is not  
344 expected to find *Thalassiosira rotula* in the more northern reaches of the Mississippi River,  
345 others (Visco et al. 2015) report that the common *Stephanodiscus minutulus* was included in a  
346 well-supported clade with a number of *Thalassiosira* species, at least based on the particular  
347 region examined. *Skeletonema potamos* and *S. costatum* are commonly reported from rivers with  
348 high conductivity, resulting from agricultural input (Potapova and Charles 2007). For example,  
349 both of these species have been found in national surveys in rivers including the Milwaukee  
350 River at Milwaukee WI and the Maumee River at Waterville OH.

351 Beyond improving reference databases, autecological information for many phytoplankton taxa  
352 exist (Reynolds et al. 2002, Padisák et al. 2009), but indices generated with 23S will need to  
353 continue to be calibrated against environmental conditions with multiple reference sites to ensure  
354 that there are not covariates driving the relationship. For example, nutrient concentrations,  
355 distance downstream, and time of sampling were all associated in this study and these other  
356 factors could be influencing the relationships we observed between phytoplankton assemblages  
357 and nutrient availability. Multiple large rivers of different nutrient status will need to be included

358 to partition out the direct effects of nutrient concentrations from other covariates driving  
359 assemblage composition. Reference databases will also need to be expanded by sequencing a  
360 larger diversity of phytoplankton organisms and identifying taxa associated with sequences.  
361 Although eDNA-based bioassessment can occur independent of taxonomy (Apotheloz-Perret-  
362 Gentil et al. 2017), more robust, stable indices will likely require ecological information about  
363 individual taxa, too. Given the breadth of taxa sequenced with 23S, this means broad biodiversity  
364 surveys are required for all phytoplankton taxa rather than a single taxonomic group, such as  
365 cyanobacteria. Although this technique should work with periphyton also, future work should  
366 continue to test whether phytoplankton or periphyton are best for bioassessment of given  
367 environmental conditions (Kireta et al. 2012a), although previous work with traditional  
368 techniques appears to favor the utility of phytoplankton over periphyton for assessing  
369 environmental conditions in some large rivers (Reavie et al. 2010), though not others (Bellinger  
370 et al. 2013).

371

## 372 **Acknowledgments**

373 This work was supported in part by the Department of Biological Sciences, College of Science,  
374 and the Office of Research and Economic Development at Louisiana State University; and the  
375 College of the Environment at the University of Washington. The authors appreciate comments  
376 from Kristy Deiner and Ian Bishop, Meredith Tyree and Nicholas Schulte for discussions on data  
377 interpretation. Sequence data are available at  
378 [www.ncbi.nlm.nih.gov/Traces/study/?acc=SRP132323](http://www.ncbi.nlm.nih.gov/Traces/study/?acc=SRP132323).

379

380

## 381 **References**

- 382 Abonyi, A., M. Leitão, A. M. Lançon, and J. Padisák. 2012. Phytoplankton functional groups as  
383 indicators of human impacts along the River Loire (France). *Hydrobiologia* **698**:233-249.
- 384 American Sportfishing Association. 2015. Economic Contributions of Recreational Fishing: U.S.  
385 Congressional Districts.
- 386 Angradi, T. R., D. W. Bolgrien, T. M. Jicha, M. S. Pearson, B. H. Hill, D. L. Taylor, E. W.  
387 Schweiger, L. Shepard, A. R. Batterman, M. F. Moffett, C. M. Elonen, and L. E.  
388 Anderson. 2009. A bioassessment approach for mid-continent great rivers: the Upper  
389 Mississippi, Missouri, and Ohio (USA). *Environmental Monitoring and Assessment*  
390 **152**:425-442.
- 391 Apotheloz-Perret-Gentil, L., A. Cordonier, F. Straub, J. Iseli, P. Esling, and J. Pawlowski. 2017.  
392 Taxonomy-free molecular diatom index for high-throughput eDNA biomonitoring. *Mol*  
393 *Ecol Resour.*
- 394 Barbour, M. T., J. Gerritsen, B. D. Snyder, and J. B. Stribling. 1999. Rapid bioassessment  
395 protocols for use in streams and wadeable rivers: periphyton, benthic macroinvertebrates  
396 and fish. US Environmental Protection Agency, Office of Water Washington, DC.
- 397 Barnes, M. A., and C. R. Turner. 2015. The ecology of environmental DNA and implications for  
398 conservation genetics. *Conservation Genetics* **17**:1-17.
- 399 Bellinger, B. J., T. R. Angradi, D. W. Bolgrien, T. M. Jicha, B. H. Hill, and E. D. Reavie. 2013.  
400 Longitudinal variation and response to anthropogenic stress in diatom assemblages of the  
401 Lower Mississippi River, USA. *River Systems* **21**:29-54.
- 402 Buss, D. F., D. M. Carlisle, T.-S. Chon, J. Culp, J. S. Harding, H. E. Keizer-Vlek, W. A.  
403 Robinson, S. Strachan, C. Thirion, and R. M. Hughes. 2015. Stream biomonitoring using

- 404 macroinvertebrates around the globe: a comparison of large-scale programs.  
405 Environmental Monitoring and Assessment **187**:1.
- 406 Cannon, M. V., J. Craine, J. Hester, A. Shalkhauser, E. R. Chan, K. Logue, S. Small, and D.  
407 Serre. 2017. Dynamic microbial populations along the Cuyahoga River. PLOS ONE  
408 **12**:e0186290.
- 409 Cannon, M. V., J. Hester, A. Shalkhauser, E. R. Chan, K. Logue, S. T. Small, and D. Serre. 2016.  
410 In silico assessment of primers for eDNA studies using PrimerTree and application to  
411 characterize the biodiversity surrounding the Cuyahoga River. Sci Rep **6**:22908.
- 412 Craine, J. M., M. V. Cannon, A. J. Elmore, S. M. Guinn, and N. Fierer. in review. DNA  
413 metabarcoding potentially reveals multi-assemblage eutrophication responses in an  
414 eastern North American river. PLOS ONE.
- 415 Davies, S. P., and S. K. Jackson. 2006. The biological condition gradient: a descriptive model for  
416 interpreting change in aquatic ecosystems. Ecological Applications **16**:1251-1266.
- 417 Deiner, K., E. A. Fronhofer, E. Machler, J. C. Walser, and F. Altermatt. 2016. Environmental  
418 DNA reveals that rivers are conveyer belts of biodiversity information. Nat Commun  
419 **7**:12544.
- 420 Dufrière, M., and P. Legendre. 1997. Species assemblages and indicator species: the need for a  
421 flexible asymmetrical approach. Ecological Monographs **67**:345-366.
- 422 Galili, T. 2015. dendextend: an R package for visualizing, adjusting, and comparing trees of  
423 hierarchical clustering. Bioinformatics.
- 424 Goffaux, D., G. Grenouillet, and P. Kestemont. 2005. Electrofishing versus gillnet sampling for  
425 the assessment of fish assemblages in large rivers. Archiv für Hydrobiologie **162**:73-90.

- 426 Hamsher, S. E., M. M. LeGresley, J. L. Martin, and G. W. Saunders. 2013. A comparison of  
427 morphological and molecular-based surveys to estimate the species richness of  
428 Chaetoceros and Thalassiosira (bacillariophyta), in the Bay of Fundy. *PLoS One*  
429 **8**:e73521.
- 430 Jackson, C. R., J. J. Millar, J. T. Payne, and C. A. Ochs. 2014. Free-Living and Particle-  
431 Associated Bacterioplankton in Large Rivers of the Mississippi River Basin Demonstrate  
432 Biogeographic Patterns. *Appl Environ Microbiol* **80**:7186-7195.
- 433 Karr, J. R. 1999. Defining and measuring river health. *Freshwater Biology* **41.2**:221-234.
- 434 Kelly, M., and B. Whitton. 1995. The trophic diatom index: a new index for monitoring  
435 eutrophication in rivers. *Journal of Applied Phycology* **7**:433-444.
- 436 Kireta, A. R., E. D. Reavie, G. V. Sgro, T. R. Angradi, D. W. Bolgrien, B. H. Hill, and T. M.  
437 Jicha. 2012a. Planktonic and periphytic diatoms as indicators of stress on great rivers of  
438 the United States: Testing water quality and disturbance models. *Ecological Indicators*  
439 **13**:222-231.
- 440 Kireta, A. R., E. D. Reavie, G. V. Sgro, T. R. Angradi, D. W. Bolgrien, T. M. Jicha, and B. H.  
441 Hill. 2012b. Assessing the condition of the Missouri, Ohio, and Upper Mississippi rivers  
442 (USA) using diatom-based indicators. *Hydrobiologia* **691**:171-188.
- 443 Lyon, J. P., T. Bird, S. Nicol, J. Kearns, J. O'Mahony, C. R. Todd, I. G. Cowx, C. J. A.  
444 Bradshaw, and J. M. Jech. 2014. Efficiency of electrofishing in turbid lowland rivers:  
445 implications for measuring temporal change in fish populations. *Canadian Journal of*  
446 *Fisheries and Aquatic Sciences* **71**:878-886.

- 447 Mächler, E., K. Deiner, P. Steinmann, and F. Altermatt. 2014. Utility of environmental DNA for  
448 monitoring rare and indicator macroinvertebrate species. *Freshwater Science* **33**:1174-  
449 1183.
- 450 Malmqvist, B., and S. Rundle. 2002. Threats to the running water ecosystems of the world.  
451 *Environmental Conservation* **29**:134-153.
- 452 Oksanen, J., F. G. Blanchet, M. Friendly, R. Kindt, P. Legendre, D. McGlenn, P. R. Minchin, R.  
453 B. O'Hara, G. L. Simpson, P. Solymos, M. H. H. Stevens, E. Szoecs, and H. Wagner.  
454 2017. *vegan: Community Ecology Package*. R package version 2.4-3.
- 455 Olds, B. P., C. L. Jerde, M. A. Renshaw, Y. Li, N. T. Evans, C. R. Turner, K. Deiner, A. R.  
456 Mahon, M. A. Brueseke, P. D. Shirey, M. E. Pfrender, D. M. Lodge, and G. A. Lamberti.  
457 2016. Estimating species richness using environmental DNA. *Ecol Evol* **6**:4214-4226.
- 458 Padisák, J., L. O. Crossetti, and L. Naselli-Flores. 2009. Use and misuse in the application of the  
459 phytoplankton functional classification: a critical review with updates. *Hydrobiologia*  
460 **621**:1-19.
- 461 Palaniappan, M., P. Gleick, L. Allen, M. Cohen, J. Christian-Smith, and C. Smith. 2010.  
462 *Clearing the waters: A focus on water quality solutions*. Nairobi, Kenya: UNEP/Pacific  
463 Institute.
- 464 Payne, J. T., J. J. Millar, C. R. Jackson, and C. A. Ochs. 2017. Patterns of variation in diversity  
465 of the Mississippi river microbiome over 1,300 kilometers. *PLoS One* **12**:e0174890.
- 466 Potapova, M., and D. F. Charles. 2007. Diatom metrics for monitoring eutrophication in rivers of  
467 the United States. *Ecological Indicators* **7**:48-70.



- 468 Reavie, E. D., T. M. Jicha, T. R. Angradi, D. W. Bolgrien, and B. H. Hill. 2010. Algal  
469 assemblages for large river monitoring: Comparison among biovolume, absolute and  
470 relative abundance metrics. *Ecological Indicators* **10**:167-177.
- 471 Reyjol, Y., G. Loot, and S. Lek. 2005. Estimating sampling bias when using electrofishing to  
472 catch stone loach. *Journal of Fish Biology* **66**:589-591.
- 473 Reynolds, C. S., V. Huszar, C. Kruk, L. Naselli-Flores, and S. Melo. 2002. Towards a functional  
474 classification of the freshwater phytoplankton. *Journal of plankton research* **24**:417-428.
- 475 Schoolmaster, D. R., J. B. Grace, and E. William Schweiger. 2012. A general theory of  
476 multimetric indices and their properties. *Methods in Ecology and Evolution* **3**:773-781.
- 477 Stein, E. D., M. C. Martinez, S. Stiles, P. E. Miller, and E. V. Zakharov. 2014a. Is DNA  
478 barcoding actually cheaper and faster than traditional morphological methods: results  
479 from a survey of freshwater bioassessment efforts in the United States? *PLoS One*  
480 **9**:e95525.
- 481 Stein, E. D., B. P. White, R. D. Mazor, J. K. Jackson, J. M. Battle, P. E. Miller, E. M. Pilgrim,  
482 and B. W. Sweeney. 2014b. Does DNA barcoding improve performance of traditional  
483 stream bioassessment metrics? *Freshwater Science* **33**:302-311.
- 484 Thomsen, P. F., and E. Willerslev. 2015. Environmental DNA – An emerging tool in  
485 conservation for monitoring past and present biodiversity. *Biological Conservation*  
486 **183**:4-18.
- 487 US Environmental Protection Agency. 2015. A compilation of cost data associated with the  
488 impacts and control of nutrient pollution. US EPA Office of Water.
- 489 Vannote, R. L., G. W. Minshall, K. W. Cummins, J. R. Sedell, and C. E. Cushing. 1980. The  
490 river continuum concept. *Canadian Journal of Fisheries and Aquatic Sciences* **37**:130-137.

491 Warnes, G. R., B. Bolker, L. Bonebakker, R. Gentleman, W. Huber, A. Liaw, T. Lumley, M.  
492 Maechler, A. Magnusson, S. Moeller, M. Schwartz, and B. Venables. 2016. gplots:  
493 Various R Programming Tools for Plotting Data. R package version 3.0.1.

494 Young, R. A., and J. B. Loomis. 2014. Determining the economic value of water: concepts and  
495 methods. Routledge.

496 Zimmermann, J., G. Glockner, R. Jahn, N. Enke, and B. Gemeinholzer. 2015. Metabarcoding vs.  
497 morphological identification to assess diatom diversity in environmental studies. *Mol*  
498 *Ecol Resour* **15**:526-542.

499  
500  
501  
502

503 Table 1. Table of indicator values for different clusters. See Figure 4 for which sites belong to  
504 each cluster.

| OTU     | Taxon                                   | Cluster    | Indicator value | P value |
|---------|-----------------------------------------|------------|-----------------|---------|
| OTU.12  | <i>Planktothrix agardhii</i>            | Site A     | 0.85            | <0.001  |
| OTU.29  | <i>Cryptomonas obovoidea</i>            | Site A     | 0.83            | 0.03    |
| OTU.79  | <i>Skeletonema marinoi</i>              | 2          | 0.74            | <0.001  |
| OTU.10  | <i>Teleaulax acuta</i>                  | 3          | 0.66            | <0.001  |
| OTU.37  | <i>Cryptomonas</i> sp. Sinjeong 080610A | 3          | 0.61            | 0.02    |
| OTU.338 | <i>Plagioselmis nannoplanctica</i>      | 3          | 0.41            | 0.03    |
| OTU.192 | <i>Cyclotella</i> sp. WC03_2            | 3          | 0.36            | <0.001  |
| OTU.48  | <i>Cyclotella</i> sp. WC03_2            | 3          | 0.34            | 0.002   |
| OTU.49  | <i>Choricystis parasitica</i>           | Sample Ai1 | 0.99            | 0.003   |
| OTU.418 | <i>Nannochloropsis salina</i>           | Sample Ai1 | 0.92            | 0.01    |
| OTU.77  | <i>Navicula salinicola</i>              | Sample Ai1 | 0.58            | 0.006   |
| OTU.96  | <i>Gymnodinium eucyaneum</i>            | Sample Ai1 | 0.55            | 0.04    |
| OTU.1   | <i>Thalassiosira rotula</i>             | 5          | 0.30            | 0.003   |
| OTU.145 | <i>Gymnodinium eucyaneum</i>            | 6          | 0.67            | 0.03    |
| OTU.189 | <i>Tenuicylindrus</i> sp. LG-2015       | 6          | 0.65            | <0.001  |
| OTU.100 | <i>Cryptochloris</i> sp. PR-2015        | 6          | 0.62            | 0.04    |
| OTU.3   | <i>Melosira tropica</i>                 | 6          | 0.43            | 0.002   |
| OTU.43  | <i>Ochromonas danica</i>                | Itasca     | 1.00            | 0.05    |
| OTU.28  | <i>Dinophysis fortii</i>                | Itasca     | 0.98            | 0.01    |
| OTU.14  | <i>Trachydiscus minutus</i>             | Itasca     | 0.87            | <0.001  |

|        |                                 |               |      |      |
|--------|---------------------------------|---------------|------|------|
| OTU.50 | <i>Synechococcus</i> sp. RCC307 | Samples U1,W1 | 0.50 | 0.04 |
|--------|---------------------------------|---------------|------|------|

505

506

507 Table 2. 23S OTU predictors of nutrient concentrations including sums of squares, estimates ( $\mu\text{g}$   
 508  $\text{L}^{-1}$ ), and  $P$  values. Coefficients of variation for  $[\text{NH}_4^+]$ ,  $[\text{NO}_3^-]$ , and  $[\text{PO}_4^{3-}]$  were 0.38, 0.61, 0.80,  
 509 respectively.

510

| Nutrient               | Variable                      | %SS   | Estimate                | $P$ value |
|------------------------|-------------------------------|-------|-------------------------|-----------|
| [ $\text{NH}_4^+$ ]    | Intercept                     |       | $3.2 \pm 0.8$           | <0.001    |
|                        | <i>Sellaphora pupula</i>      | 100%  | $492.4 \pm 75.7$        | <0.001    |
| [ $\text{NO}_3^-]$     | Intercept                     |       | $1046 \pm 148.4$        | <0.001    |
|                        | <i>Cyclotella</i> sp. WC03_2  | 34.1% | $-1947.5 \pm 453.1$     | <0.001    |
|                        | <i>Melosira tropica</i>       | 23.0% | $4152.7 \pm 1177.9$     | <0.001    |
|                        | <i>Navicula salinicola</i>    | 22.6% | $67288.8 \pm 19245.2$   | <0.001    |
|                        | <i>Dinophysis fortii</i>      | 20.3% | $5803301 \pm 1749619.8$ | 0.002     |
| [ $\text{PO}_4^{3-}$ ] | Intercept                     |       | $2.4 \pm 6.4$           | 0.7095    |
|                        | <i>Cyclotella</i> sp. WC03_2  | 8.2%  | $248.3 \pm 61.1$        | <0.001    |
|                        | <i>Skeletonema marinoi</i>    | 38.2% | $317.3 \pm 36.2$        | <0.001    |
|                        | <i>Cyanobium</i> sp. PCC 7009 | 27.6% | $352.2 \pm 47.2$        | <0.001    |
|                        | <i>Cryptomonas ovata</i>      | 9.9%  | $1597.8 \pm 357.6$      | <0.001    |
|                        | <i>Navicula salinicola</i>    | 9.9%  | $3977.9 \pm 891.1$      | <0.001    |
|                        | <i>Dinophysis fortii</i>      | 6.2%  | $299742.4 \pm 84789.6$  | <0.001    |

511

512

513

514

515 Table 3. 16S OTU predictors of nutrient concentrations including sums of squares, estimates ( $\mu\text{g}$   
 516  $\text{L}^{-1}$ ), and  $P$  values. Coefficients of variation for  $[\text{NH}_4^+]$ ,  $[\text{NO}_3^-]$ , and  $[\text{PO}_4^{3-}]$  were  $r^2 = 0.69, 0.78,$   
 517  $0.81$ , respectively.

| Nutrient               | Variable  | %SS   | Estimate               | $P$ value |
|------------------------|-----------|-------|------------------------|-----------|
| [ $\text{NH}_4^+$ ]    | Intercept |       | $0.2 \pm 1.3$          | 0.84      |
|                        | OTU13     | 21.2% | $167.8 \pm 36.7$       | <.001     |
|                        | OTU17     | 28.8% | $-133.1 \pm 25$        | <.001     |
|                        | OTU15     | 9.2%  | $-52.5 \pm 17.4$       | 0.004     |
|                        | OTU25     | 8.2%  | $138.0 \pm 48.4$       | 0.006     |
|                        | OTU45     | 32.6% | $899.3 \pm 158.6$      | <.001     |
| [ $\text{NO}_3^-$ ]    | Intercept |       | $1875.2 \pm 125.5$     | <.001     |
|                        | OTU3      | 11.1% | $6966.0 \pm 1961.3$    | <0.001    |
|                        | OTU7      | 11.7% | $-14045.1 \pm 3850.6$  | <0.001    |
|                        | OTU19     | 9.6%  | $-49899.6 \pm 15098.3$ | 0.002     |
|                        | OTU44     | 18.5% | $-37316.1 \pm 8125.9$  | <0.001    |
|                        | OTU25     | 31.0% | $32079.2 \pm 5393.8$   | <0.001    |
|                        | OTU35     | 18.2% | $-20507.3 \pm 4508.4$  | <0.001    |
| [ $\text{PO}_4^{3-}$ ] | Intercept |       | $102.5 \pm 8.7$        | <0.001    |
|                        | OTU15     | 55.0% | $-916.7 \pm 105.6$     | <0.001    |
|                        | OTU23     | 7.8%  | $-1054.3 \pm 322.7$    | 0.002     |
|                        | OTU30     | 11.7% | $3924.4 \pm 981.9$     | <0.001    |
|                        | OTU49     | 25.5% | $-3925.7 \pm 663.6$    | <0.001    |

519

520

521

522 Figure captions.

523 Figure 1. Accumulation of OTUs with additional samples. 50% of the accumulation of OTUs

524 occurs with 11.8 samples and richness is predicted to asymptote at 447 samples.

525 Figure 2. Relative read abundance of four most abundant OTUs as a function of distance from

526 the mouth of the Mississippi River.

527 Figure 3. Relative read abundance of five main taxonomic groups as a function of distance from

528 the mouth of the Mississippi River.

529 Figure 4. Heat map of abundances of OTUs at sites along the Mississippi River based on the

530 standardized relative abundance of the 50 most abundant 23S OTUs. Blue indicates a low

531 relative abundance and red high with gray intermediate. Sites and OTUs were clustered

532 hierarchically based on dissimilarity index of relative abundances. Four major site clusters

533 shown in color including Cluster 2 (purple), Cluster 5 (green), Cluster 6 (red), and Cluster 3

534 (blue).

535 Figure 5. Partial residual plots of rarefied OTU richness as a function of (a) secchi disk depth and

536 (b)  $[\text{PO}_4^{3-}]$ . Non-significant variables include distance down the river,  $[\text{NO}_3^-]$ , and  $[\text{NH}_4^+]$ .

537 Figure 6. Tanglegram for the association between site hierarchical clusterings based on 23S and

538 16S OTU abundance. Colored lines between dendrogram tips represent similar relative

539 placement of sites within the clustering diagram.





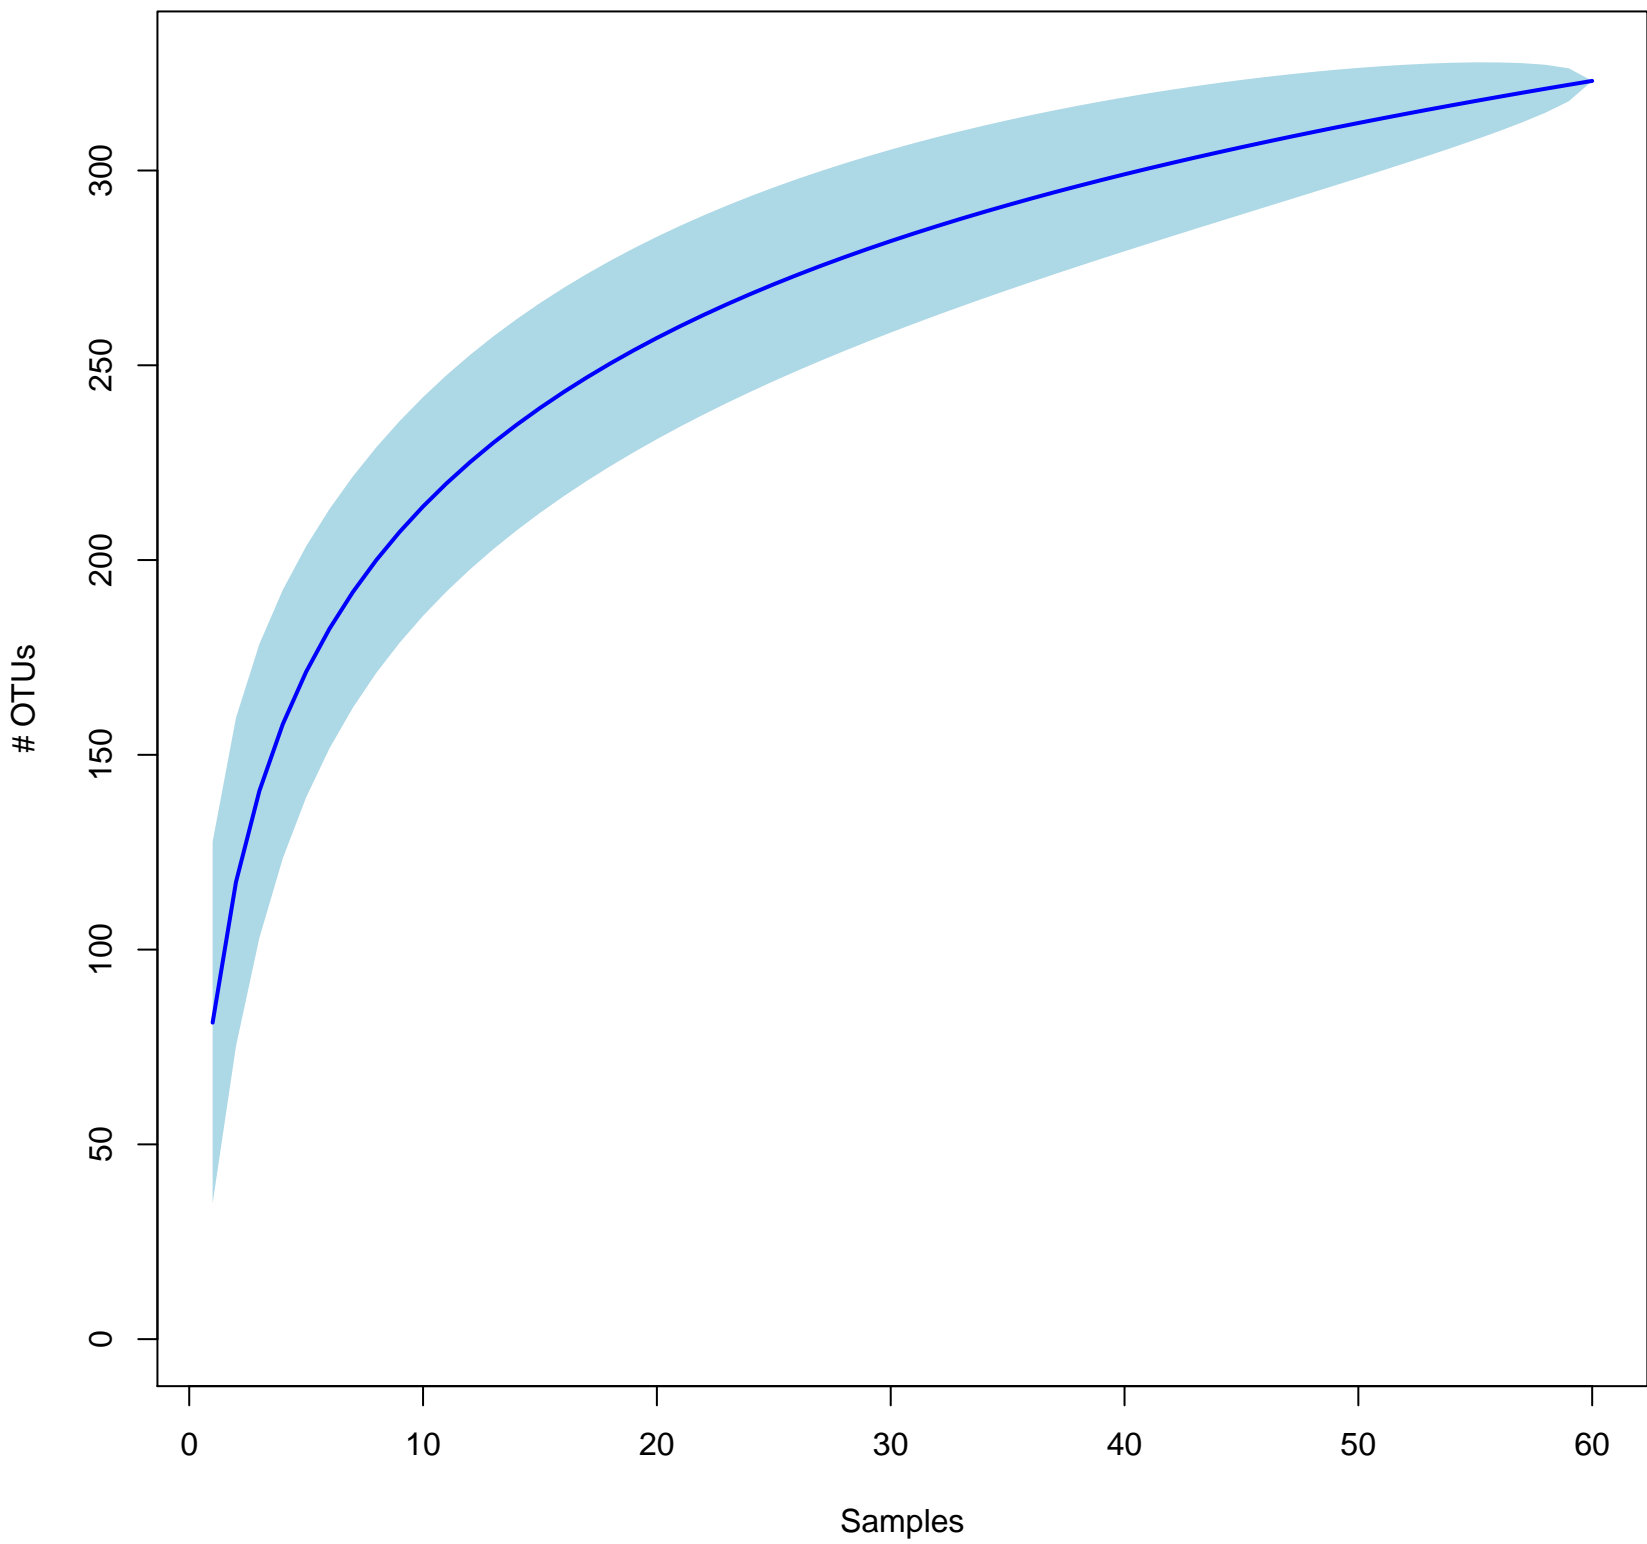

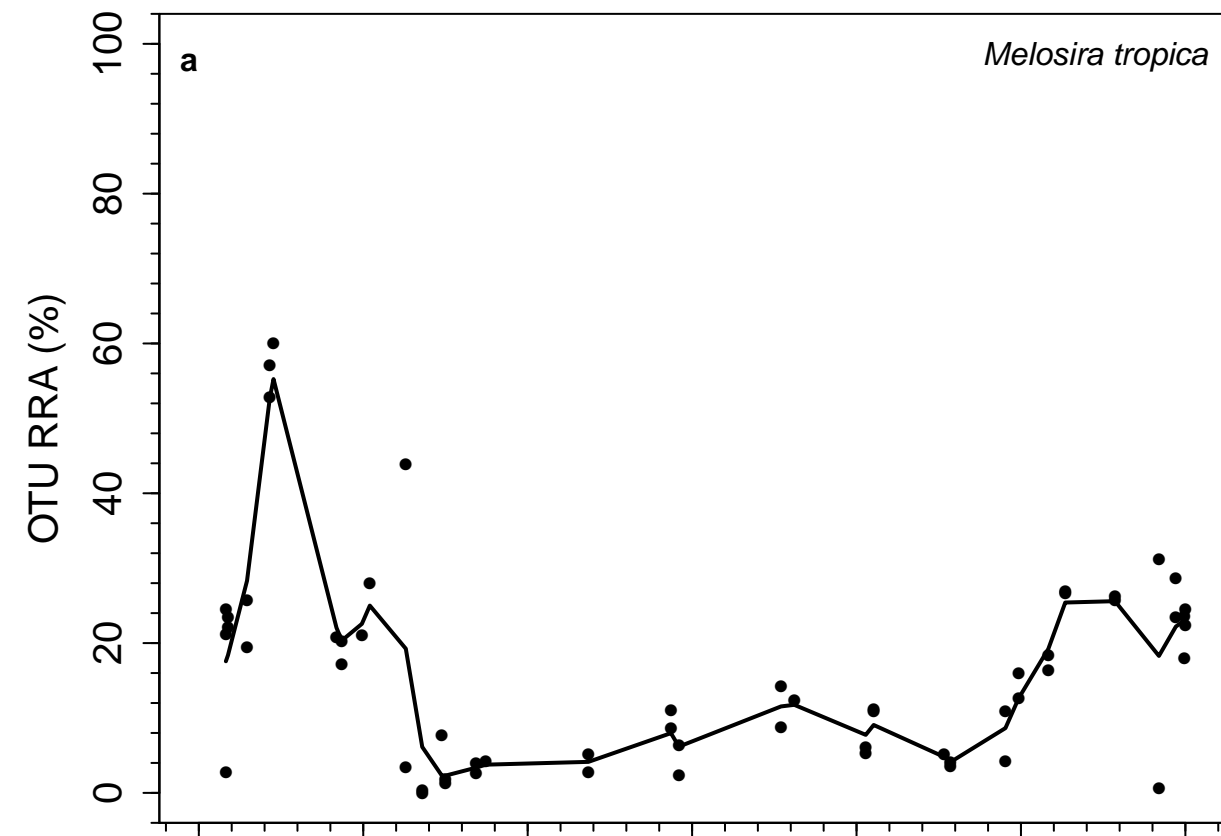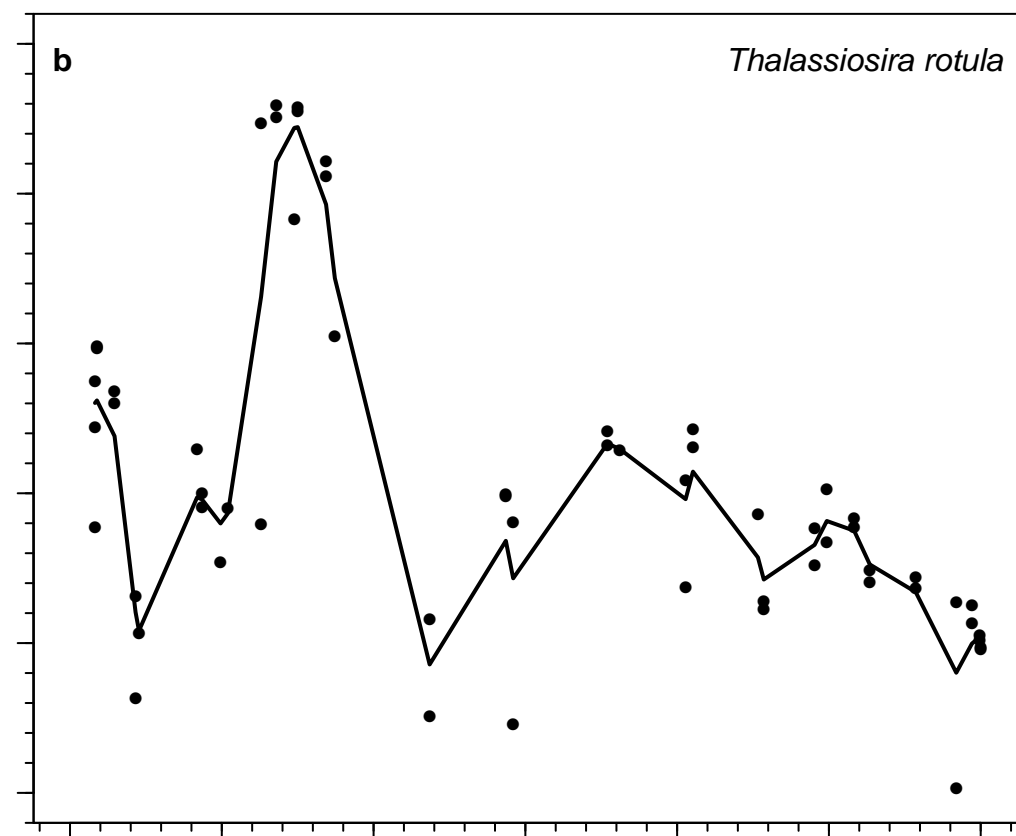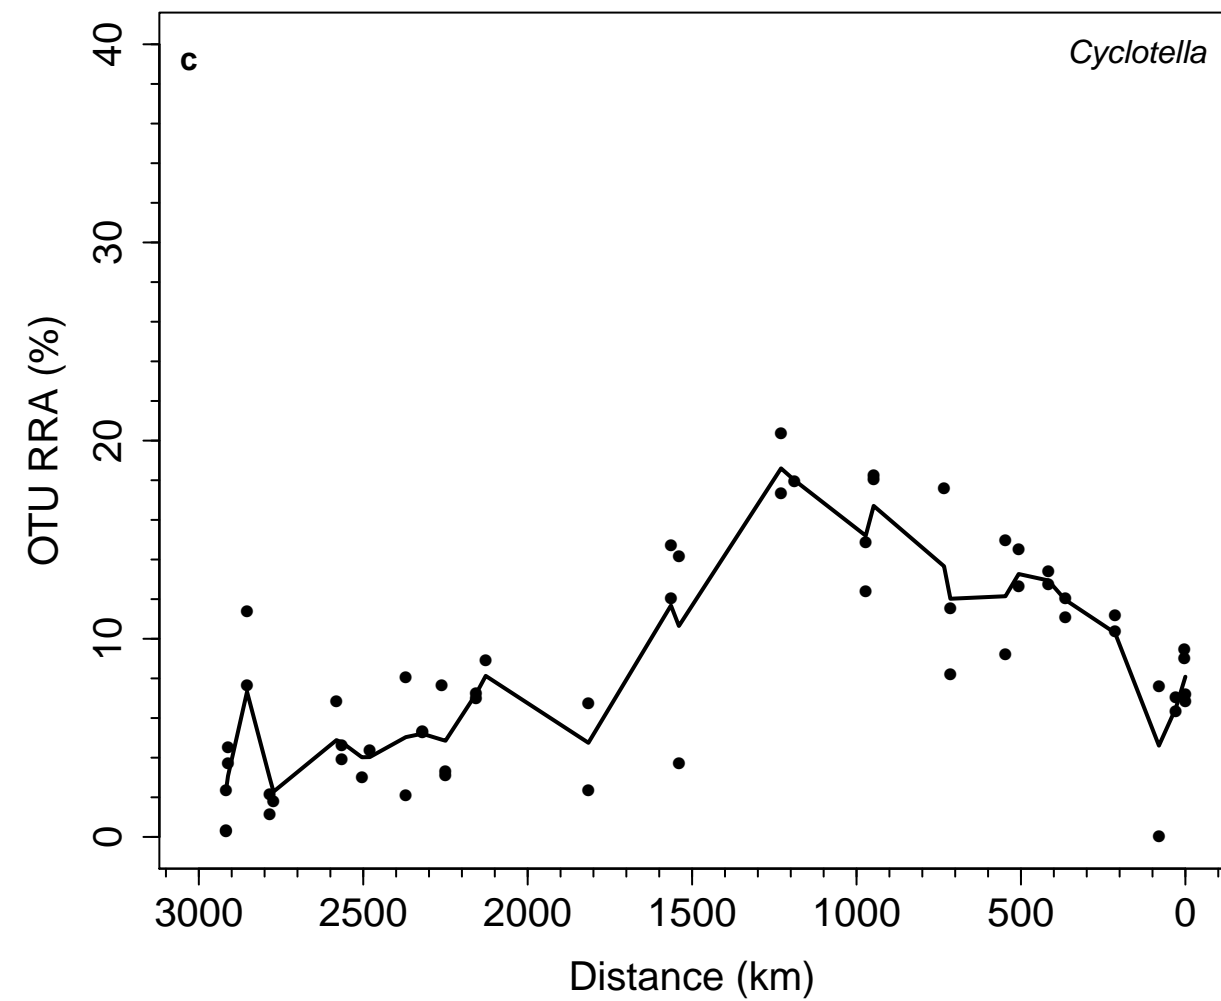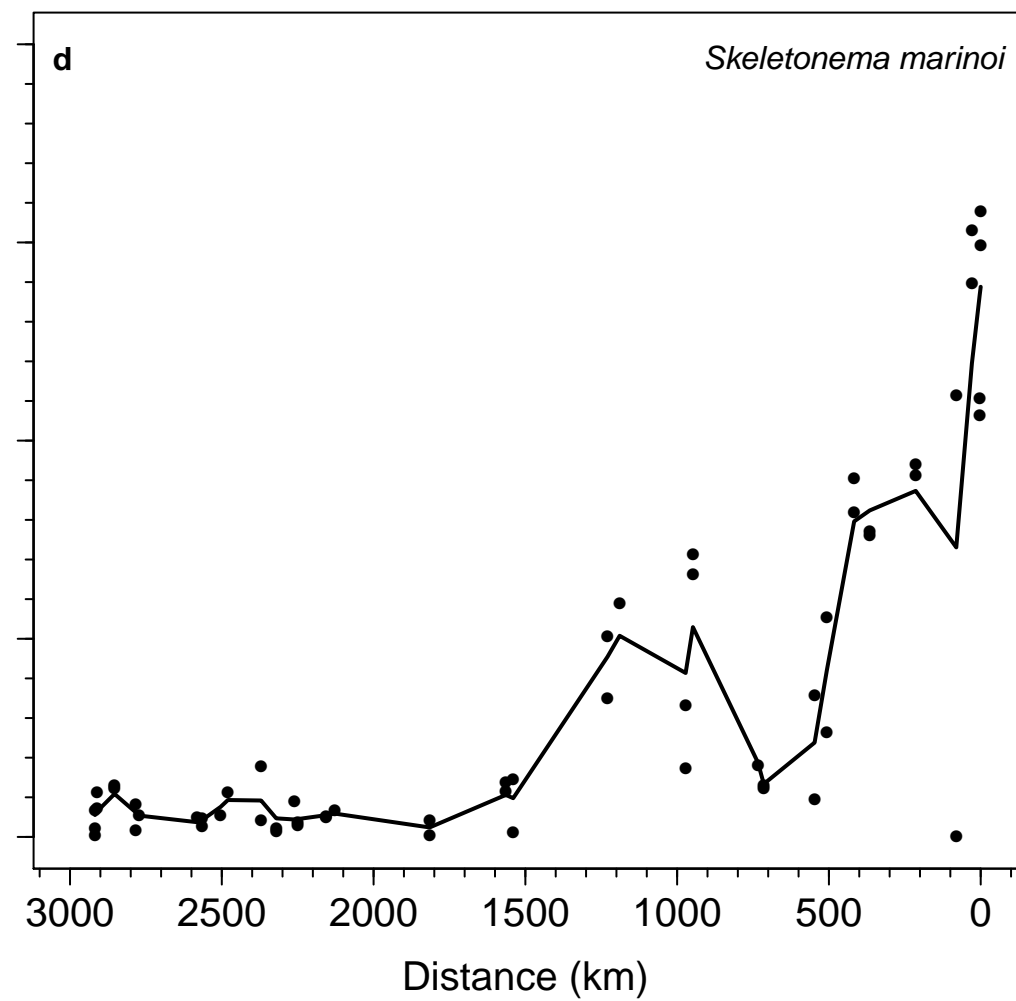

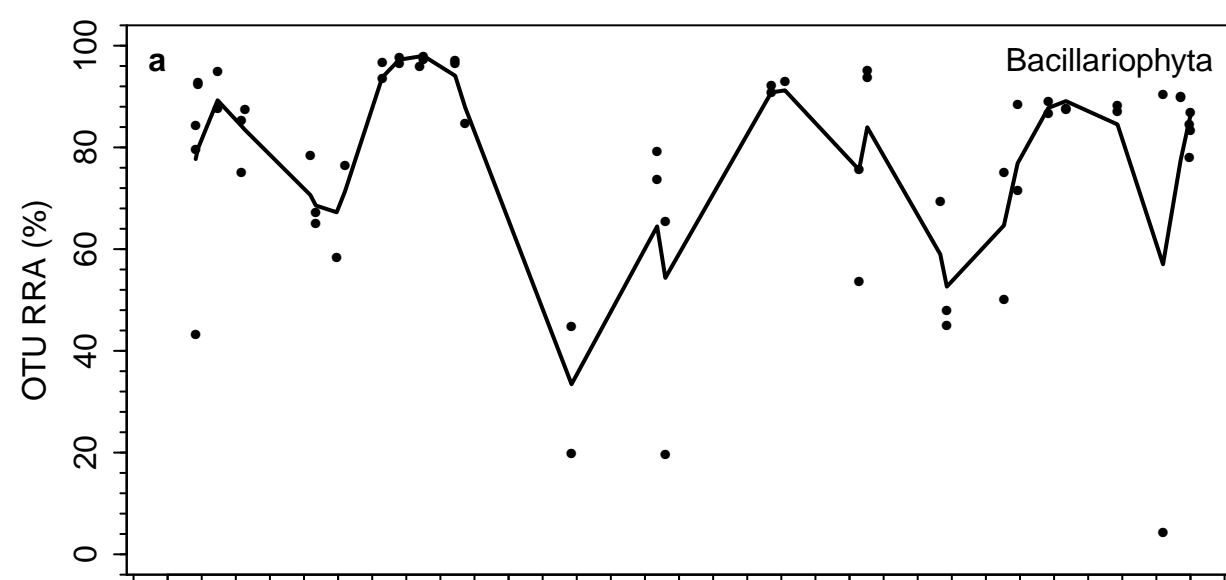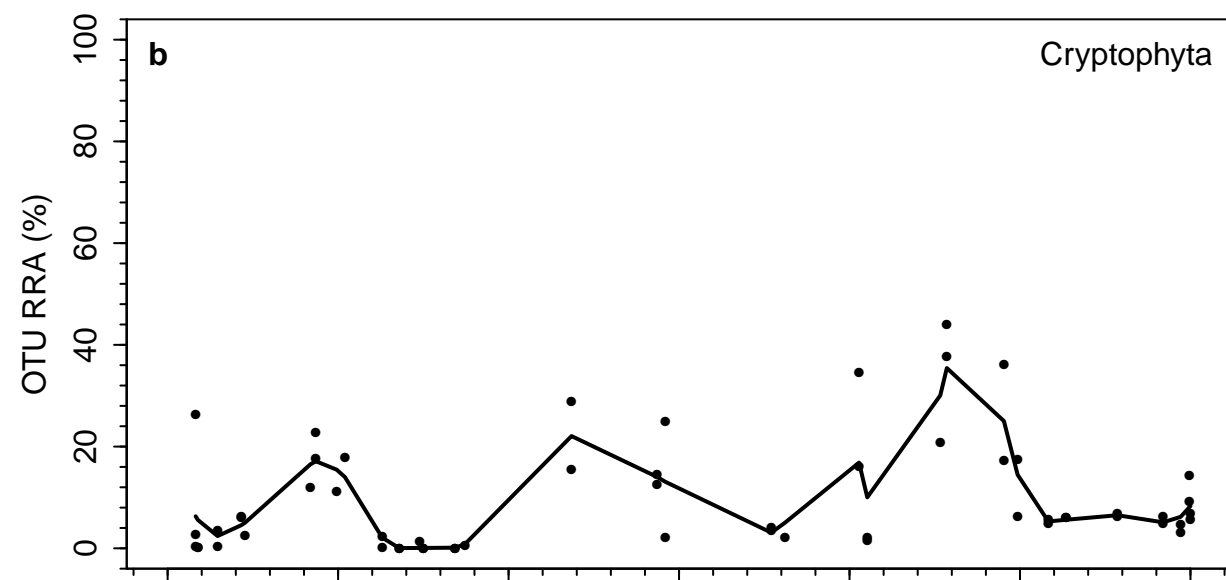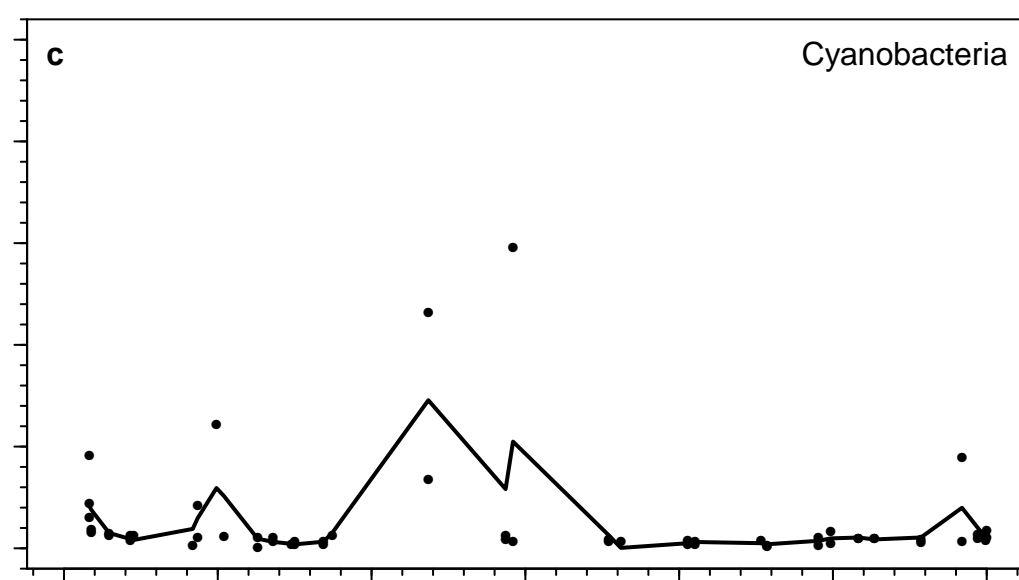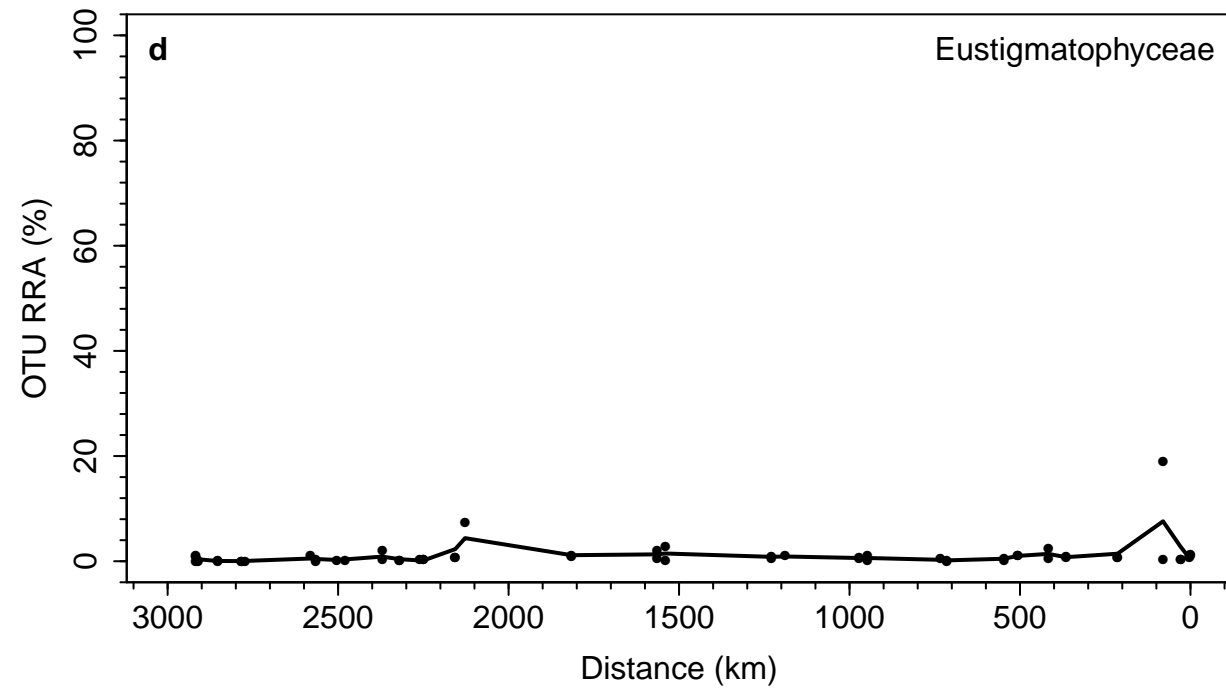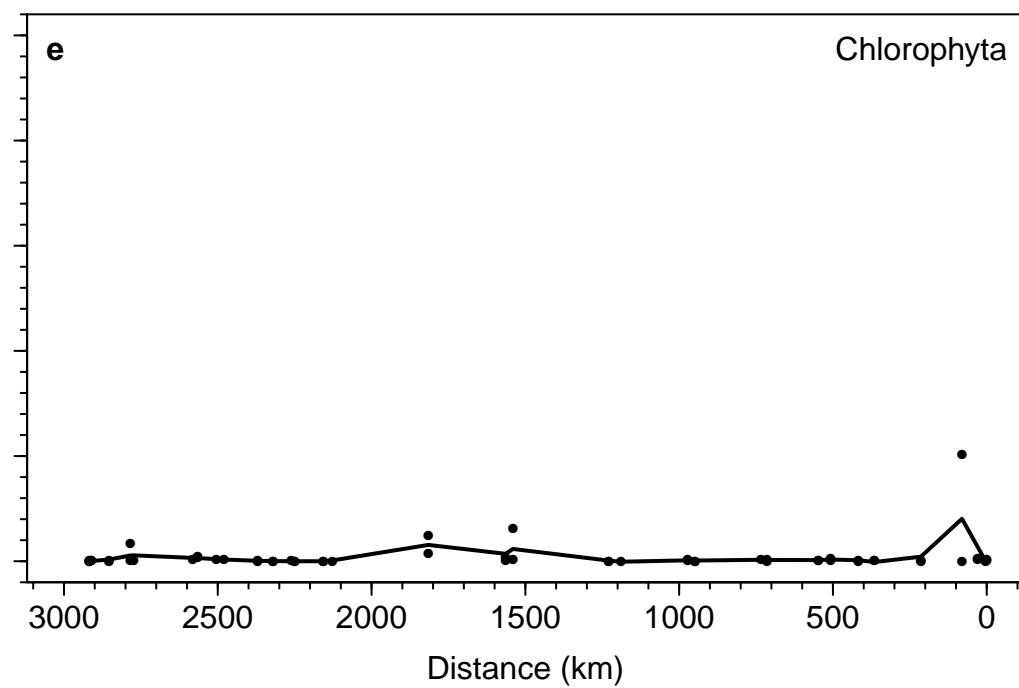

bioRxiv preprint doi: <https://doi.org/10.1101/261727>; this version posted February 8, 2018. The copyright holder for this preprint (which was not certified by peer review) is the author/funder, who has granted bioRxiv a license to display the preprint in perpetuity. It is made available under aCC-BY-NC-ND 4.0 International license.

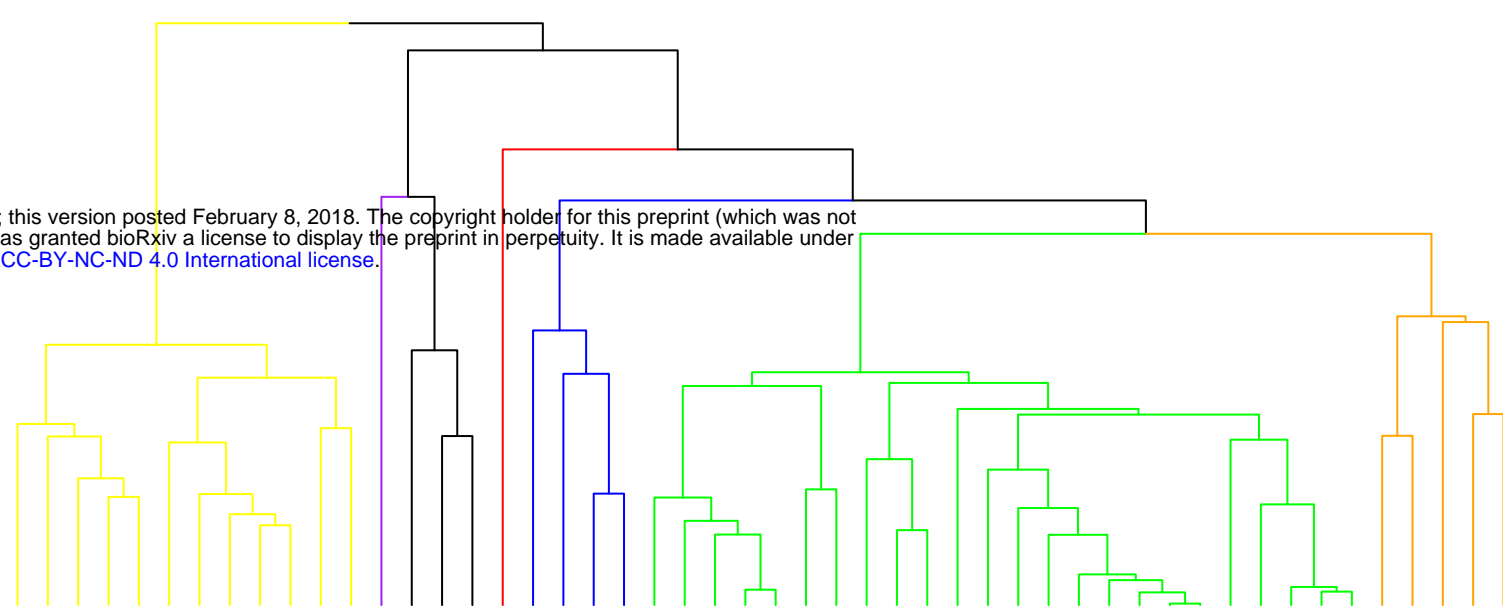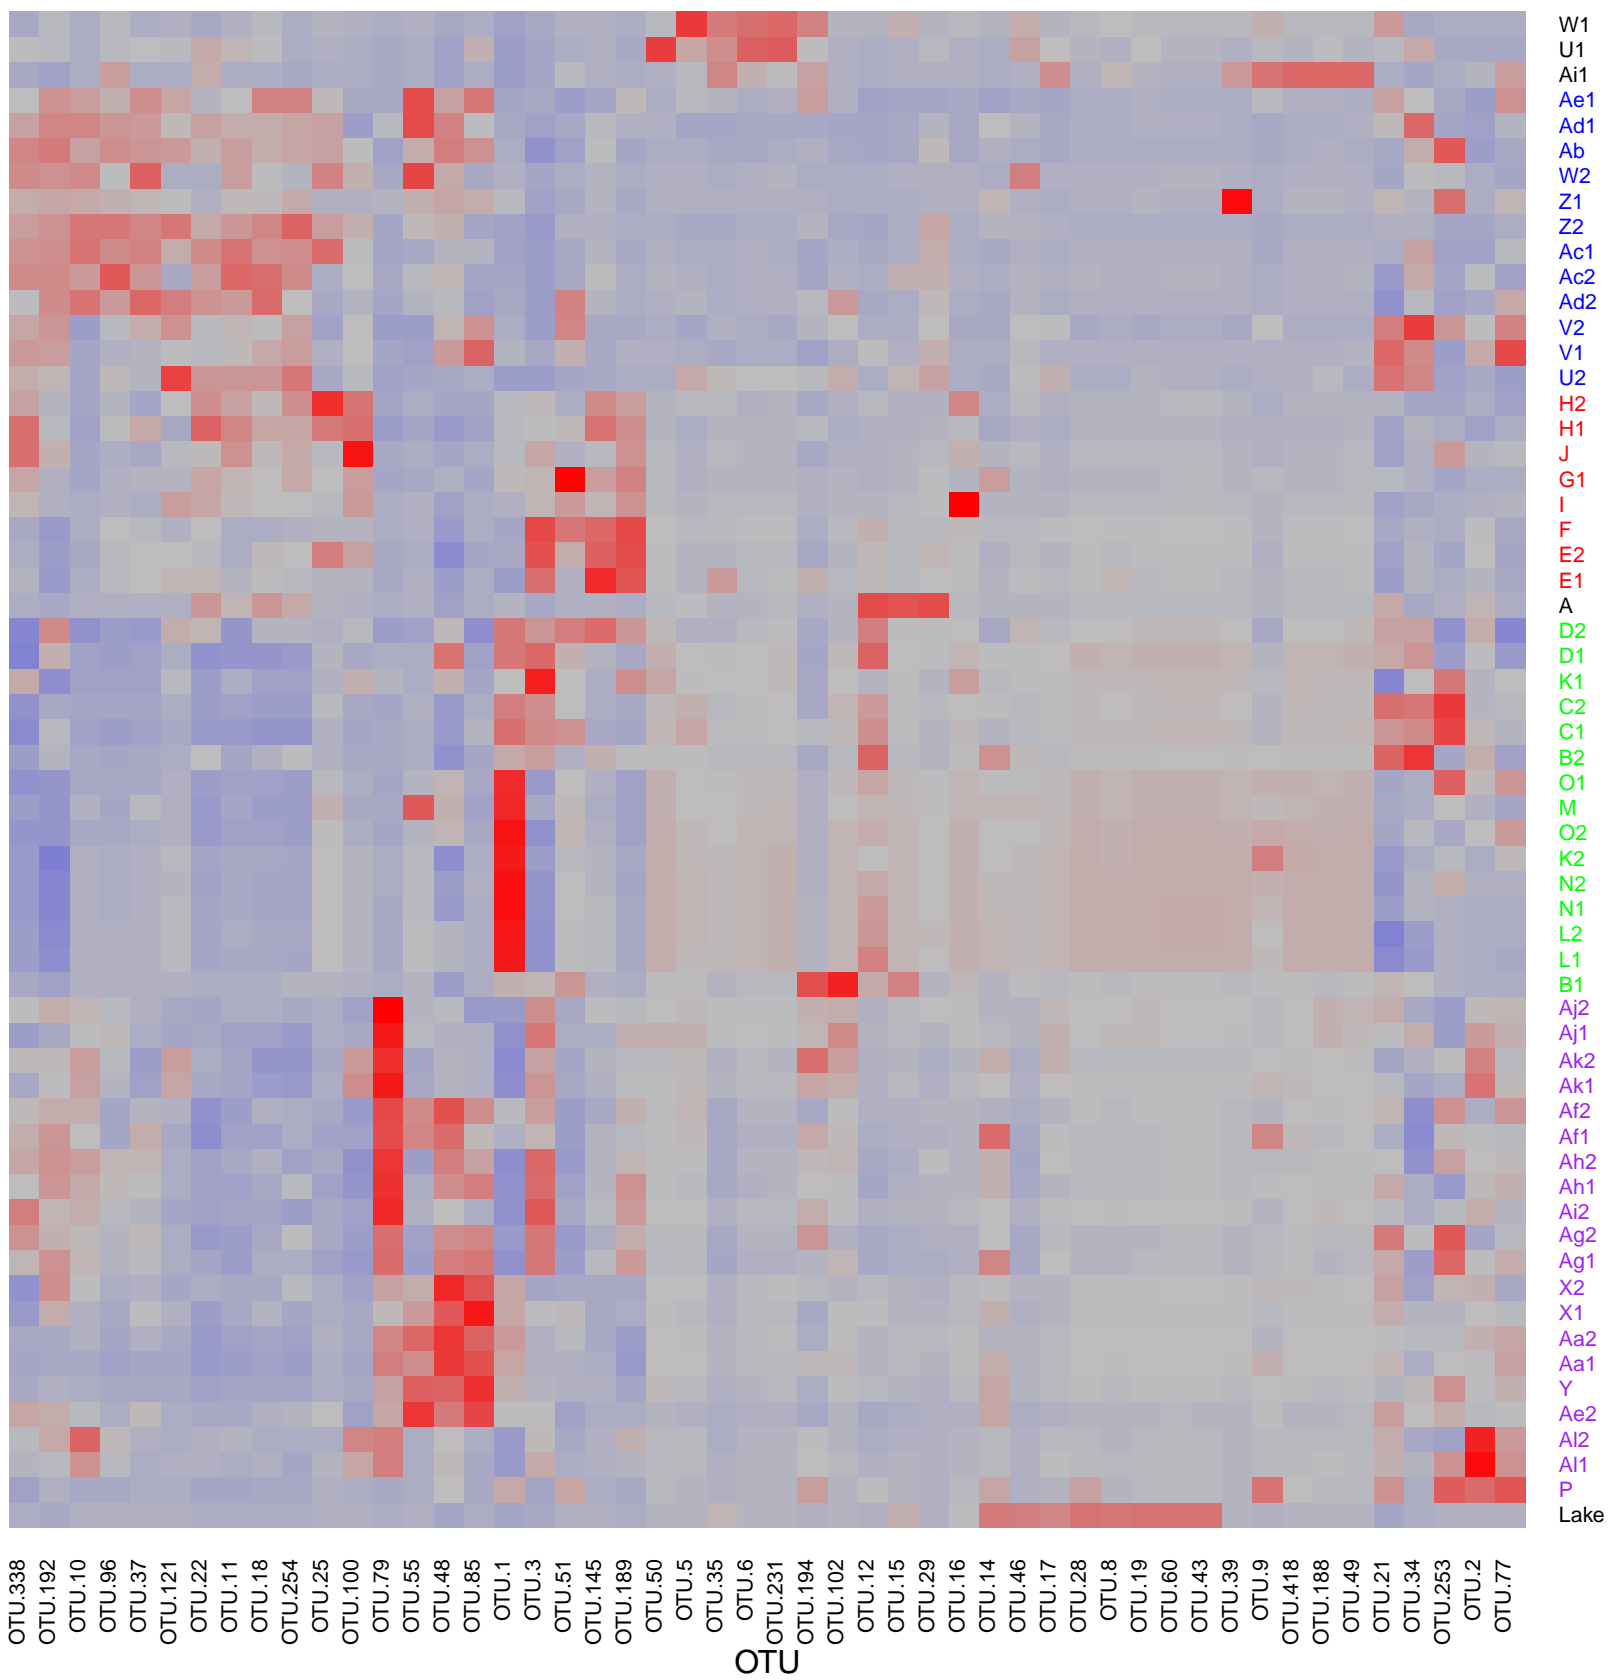

Rarefied 23S OTU richness

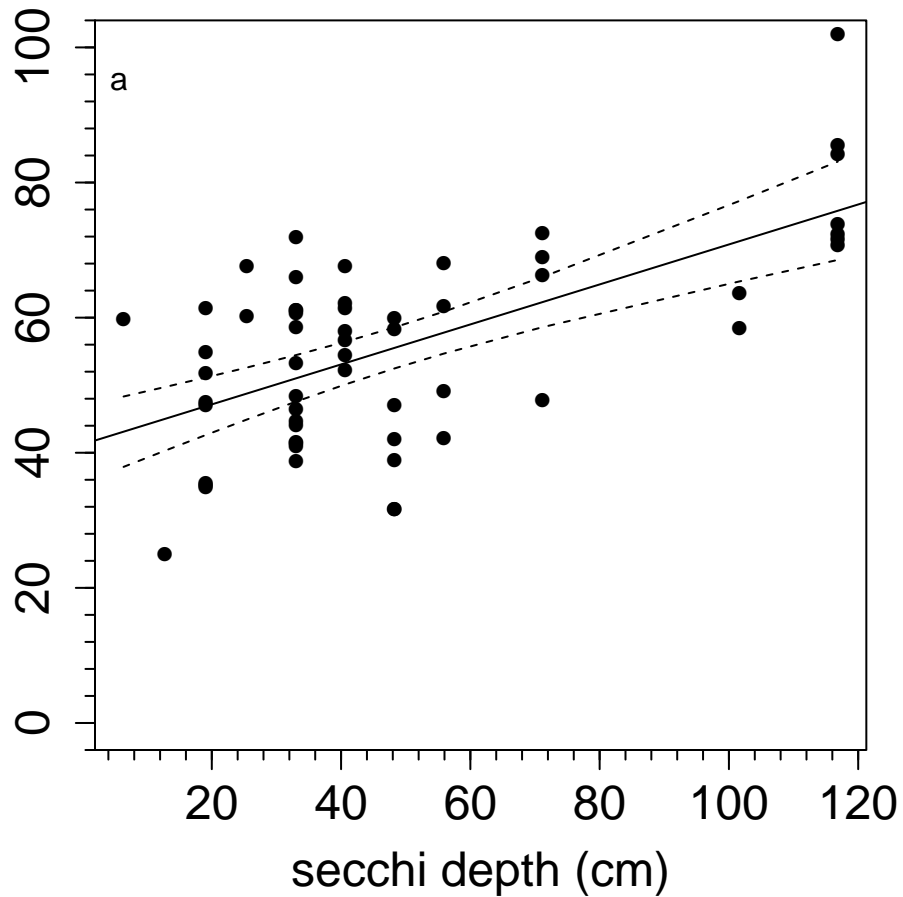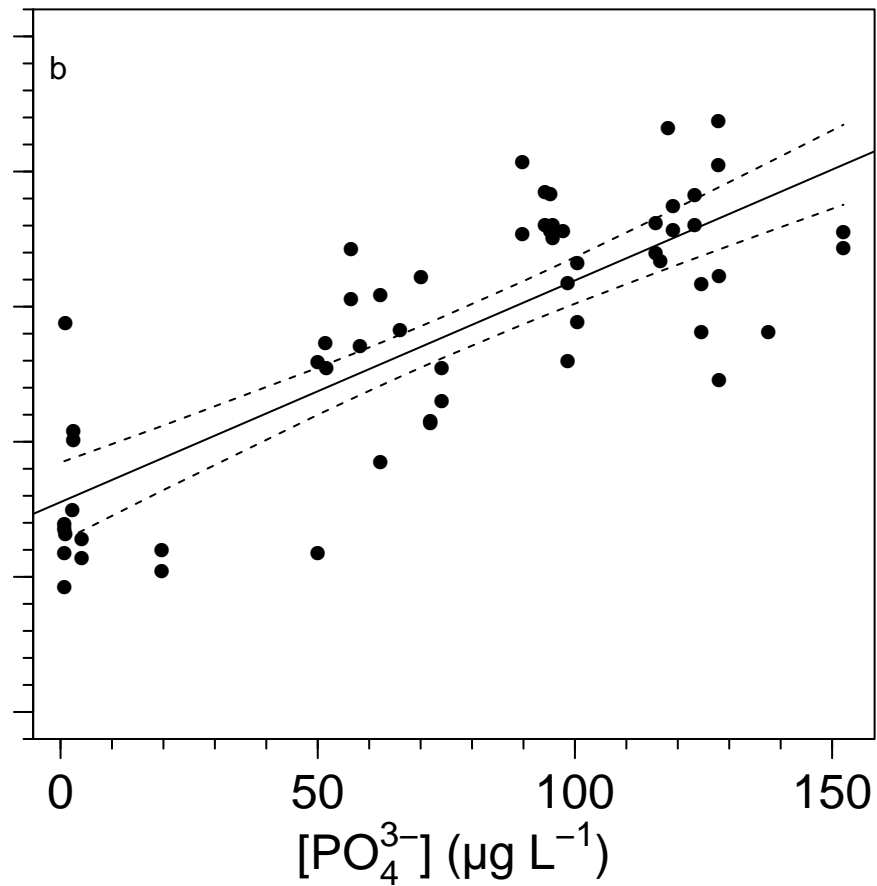

**23S**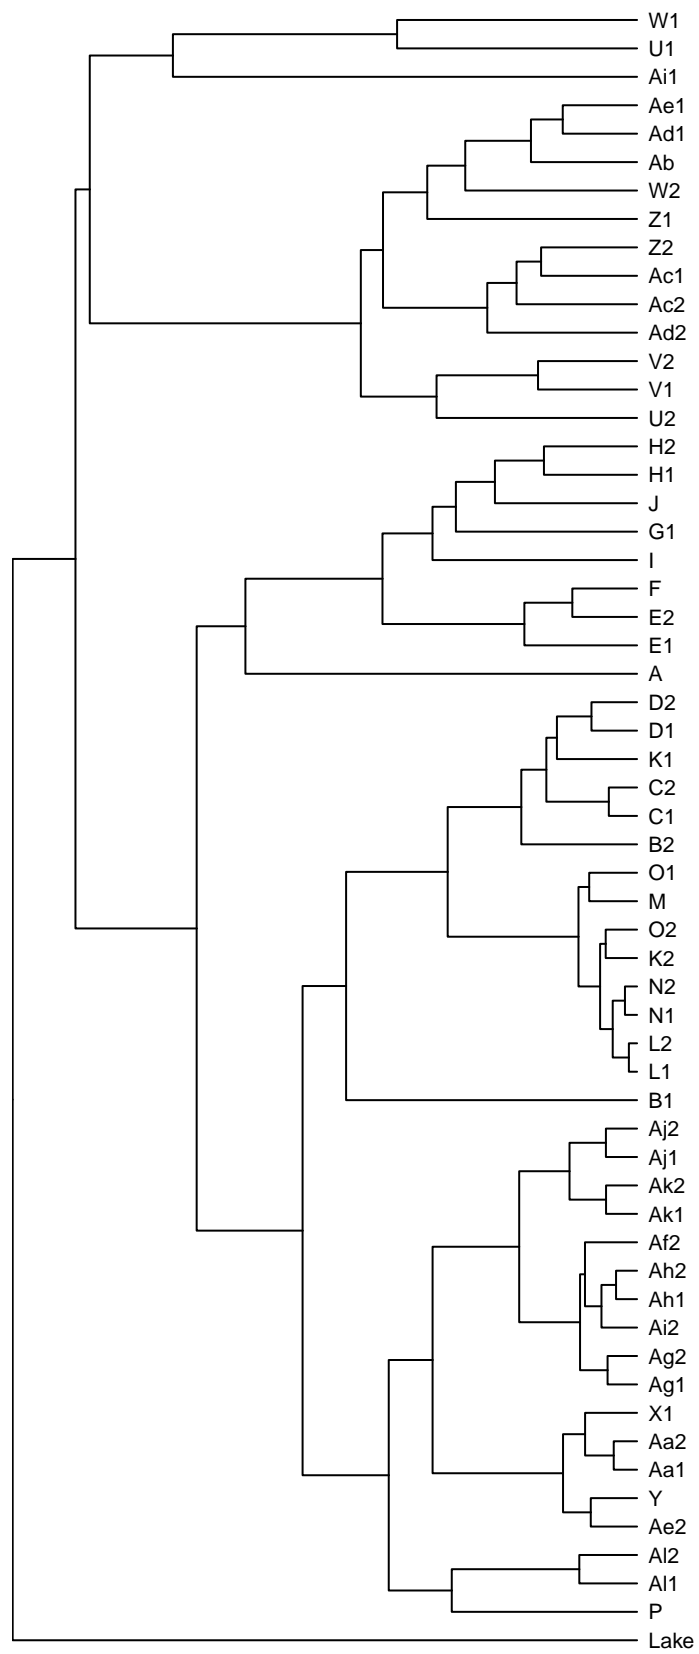**16S**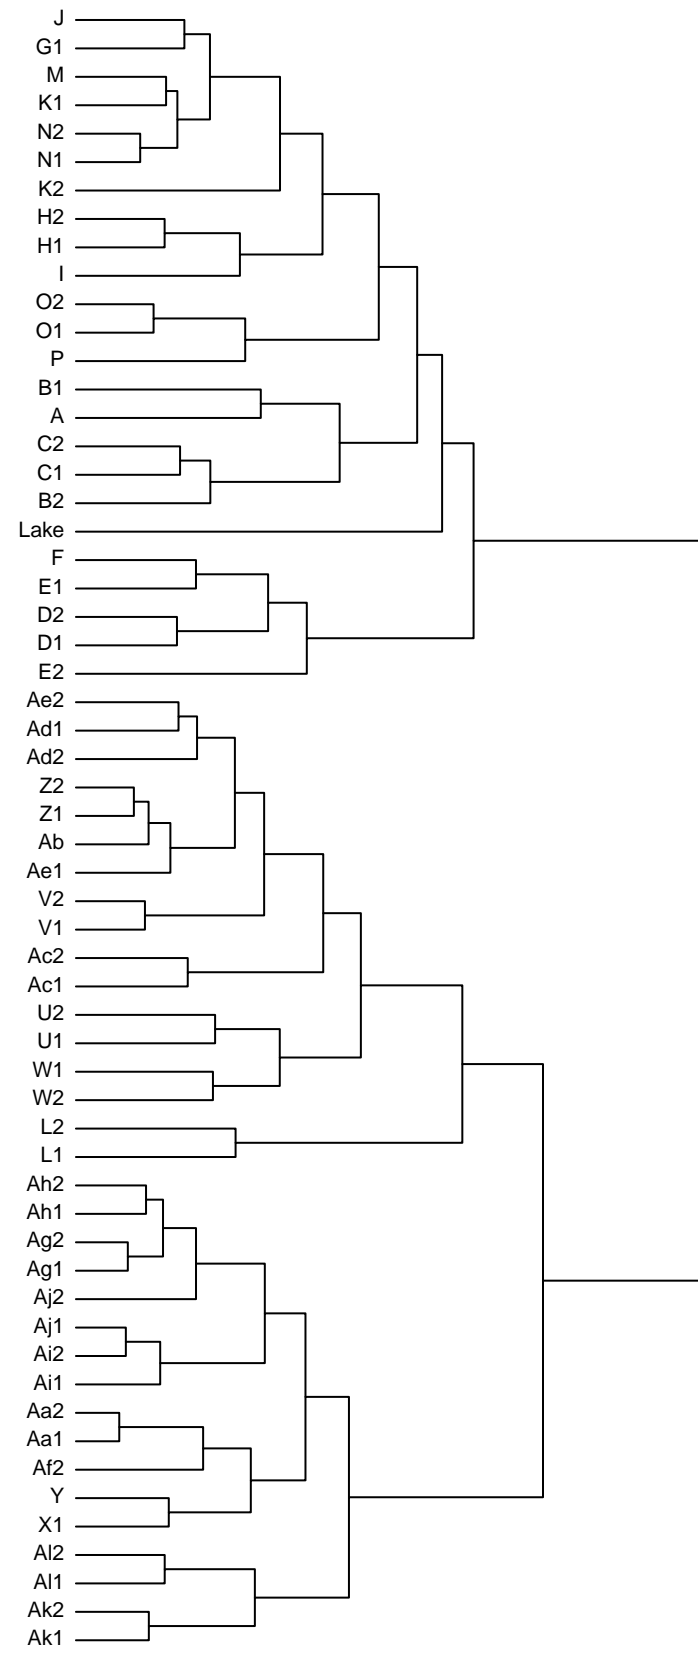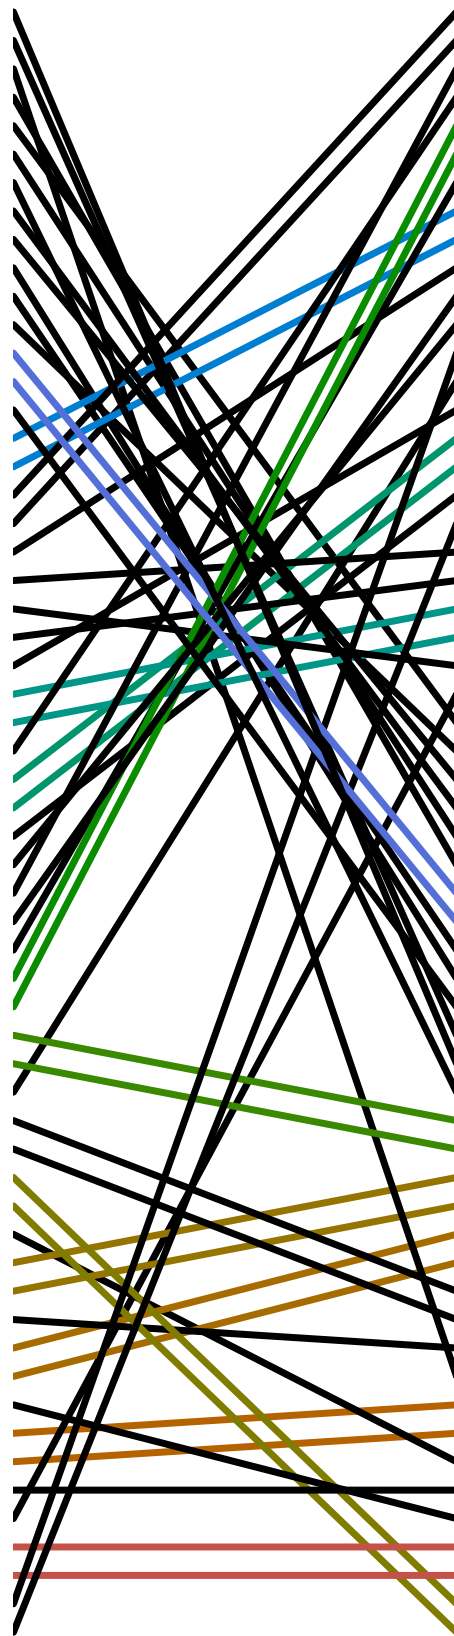

25 20 15 10 5 0

0 10 20 30 40
